1 Short title: Specialized Metabolite Diversity

2

3 Title: Switchgrass metabolomics reveals striking genotypic and developmental differences in  
4 saponins

5

6 Author for contact:

7 Robert Last, Department of Biochemistry and Molecular Biology, Michigan State University,  
8 603 Wilson RD, East Lansing, MI 48823 USA, email: [lastr@msu.edu](mailto:lastr@msu.edu), telephone: (517) 432-  
9 3278, ORCID ID: 0000-0001-6974-9587

10

11 Xingxing Li<sup>a, b</sup>, A. Daniel Jones<sup>a, b</sup> and Robert L. Last<sup>a, b, c \*</sup>

12

13 <sup>a</sup>Department of Biochemistry and Molecular Biology, Michigan State University, MI 48824;

14 <sup>b</sup>DOE Great Lakes Bioenergy Research Center, Michigan State University, MI 48824.

15 <sup>c</sup>Department of Plant Biology, Michigan State University, MI 48824

16

17 ORCID ID: 0000-0002-7725-0329 (X. L.); 0000-0002-7408-6690 (A.D.J.); 0000-0001-6974-  
18 9587 (R.L.L.)

19

20 One sentence summary: Switchgrass structurally diverse steroidal saponins and phenolics vary in  
21 abundance and structures in a tissue- and ecotype-specific manner.

22

23 \*Corresponding author: [lastr@msu.edu](mailto:lastr@msu.edu)

24

25 List of author contributions:

26 X.L. Conceived and performed research, created figures and tables and wrote manuscript

27 A.D.J. Conceived of experimental approaches, provided technical input, reviewed data, edited  
28 manuscript

29 R.L.L Conceived of experimental approaches, wrote and edited manuscript

30

31 Funding information:

32 This work was supported by the Great Lakes Bioenergy Research Center, U.S. Department of  
33 Energy, Office of Science, Office of Biological and Environmental Research under Award  
34 Number DE-SC0018409.

35

36 Email address of Author for Contact: [lastr@msu.edu](mailto:lastr@msu.edu)

37

38  
39  
40  
41  
42  
43  
44  
45  
46  
47  
48  
49  
50  
51  
52  
53  
54  
55  
56  
57  
58  
59  
60  
61  
62  
63  
64

## Abstract

Switchgrass (*Panicum virgatum* L.) is a bioenergy crop that grows productively on low-fertility lands not suitable for food production. We hypothesize that traits such as low soil nitrogen demand, tolerance to water limitation and resistance to insect pests and microbial pathogens are influenced by low molecular weight compounds known as specialized metabolites. We leveraged untargeted liquid chromatography-mass spectrometry (LC-MS) and quantitative gas chromatography-mass spectrometry (GC-MS) to identify differences in above- and below-ground metabolomes of three northern upland and three southern lowland switchgrass cultivars. This analysis documented abundant steroidal saponins and terpenoid glycosides as well as varied phenolic compounds in switchgrass extracts. We identified many metabolite ‘features’ (annotated as retention time/mass-to-charge ratio pairs), which differentially accumulated between upland and lowland ecotypes. These include saponins built on at least five different steroidal sapogenin cores. The total saponin concentrations were statistically different between roots of the two switchgrass ecotypes. In contrast, flavonoids such as quercetin mainly exhibited a tissue-specific accumulation pattern and predominantly accumulated in shoots. These results set the stage for testing the impacts of differentially accumulating metabolites on biotic and abiotic stress tolerance and inform development of low-input bioenergy crops.

65

66

## Introduction

67 Environmentally sustainable and economical production of transportation fuels and industrial  
68 feedstocks using plant biomass is a highly desirable goal for the bioeconomy (Sands et al., 2017).  
69 Dedicated energy crops that are productive with low or no chemical fertilizers and pesticides on  
70 land that is unsuitable for food and fiber crops have received much attention (Sands et al., 2017).  
71 This requires development of plants with a suite of ‘ideal’ traits (Jiao et al., 2010), including  
72 perennial life cycle, rapid growth under low soil fertility and water content as well as resilience  
73 to pests and pathogens.

74 Plants are master biochemists, producing a wide variety of general and specialized metabolites  
75 adaptive to their ecological niches (Pichersky & Lewinsohn, 2011). The structurally diverse  
76 tissue- and clade-specific specialized metabolites play varied roles in plants coping with biotic  
77 and abiotic stresses, both by deterring and promoting interactions. For instance, glucosinolates  
78 produced by crucifers such as mustard, cabbage and horseradish, mediate interactions with insect  
79 herbivores (Hartmann, 2007). Terpenoids – a diverse class of natural products – can function as  
80 antimicrobial phytoalexins (Ahuja et al., 2012). Specialized metabolites may also promote  
81 beneficial interactions, ranging from pollinator attraction to signaling that leads to beneficial  
82 microbe-plant interactions. As a classic example, flavonoids inducing the rhizobial  
83 lipochitooligosaccharides (‘Nod factors’) initiate the rhizobium-legume nitrogen fixation  
84 symbiosis (Poole et al., 2018). Strigolactones are signaling molecules involved in plant  
85 symbioses with Arbuscular Mycorrhizal fungi, which in turn enables efficient plant phosphate  
86 uptake (Massalha et al., 2017). For these reasons, modifying plant specialized metabolism is an  
87 attractive target for bioengineering or trait breeding to create low-input bioenergy crops that can  
88 thrive on ‘marginal’ lands.

89 While hundreds of thousands of specialized metabolites are estimated to be produced by plants  
90 (Pichersky & Lewinsohn, 2011), there are reasons why this number is almost certainly an  
91 underestimate. First, these metabolites are taxonomically restricted, often showing interspecies  
92 or even intraspecies variation (Pichersky & Lewinsohn, 2011); thus any species, ecotype or  
93 cultivar sampled will underrepresent phenotypic diversity. Second, specialized metabolites tend  
94 to be produced in a subset of cell- or tissue-types in any plant species analyzed; thus cataloging

95 the metabolic potential of even a single species requires extraction of multiple tissues over the  
96 plant's development. Third, accumulation of these metabolites can be impacted by growth  
97 conditions and induced by abiotic or biotic stress (Tissier et al., 2014). Finally, identification and  
98 structural characterization of newly discovered metabolites require specialized capabilities,  
99 typically a combination of mass spectrometry (MS) and nuclear magnetic resonance (NMR)  
100 spectroscopy analysis (Last et al., 2007). These methodologies traditionally are labor intensive  
101 and inherently low throughput. As a result, plant specialized metabolite structures and  
102 biosynthetic pathways remain underexplored.

103 Developments in the field of liquid chromatography mass spectrometry (LC-MS) based  
104 untargeted metabolomics (Schrimpe-Rutledge et al., 2016) enable characterization of plant  
105 metabolomes in an increasingly high-throughput manner. Rather than identifying the structure of  
106 each metabolite in a sample, metabolomics seeks to obtain a snapshot of global patterns based on  
107 the mass spectra of metabolites that are chromatographically separated based on their physical  
108 properties (Last et al., 2007). This approach can be used as a powerful tool to aid crop breeding  
109 (Turner et al., 2016) and assessing biotech crops (Christ et al., 2018) in agriculture.

110 The North American native perennial switchgrass (*Panicum virgatum* L.) has the potential to be  
111 cultivated as a low-input bioenergy crop for growing on nonagricultural land (Sanderson et al.,  
112 2006). The two principal ecotypes of switchgrass are phenotypically divergent, including in  
113 flowering time, plant size, physiology and disease resistance. Upland ecotypes exhibit robust  
114 freezing tolerance but produce relatively low biomass yield in part due to early flowering  
115 (Nielsen, 1947; Kiniry et al., 2013; Casler et al., 2015; Sage et al., 2015). Plants of the lowland  
116 ecotype typically found in riparian areas produce large amounts of biomass and are more  
117 flooding- and heat-tolerant, pathogen-resistant and nutrient-use-efficient than the upland ecotype  
118 (Aspinwall et al., 2013; Uppalapati et al., 2013; Casler et al., 2015). However, these lowland  
119 ecotypes do not perform well in northern areas, largely due to lack of cold tolerance. Although  
120 the characterization of the switchgrass microbiome is still in its infancy, there is evidence that the  
121 microbiomes of these two ecotypes differ and change throughout the growing season (Grady et  
122 al., 2019; Singer et al., 2019).

123 Microbiome-associated traits have received significant attention in recent years since they can  
124 influence plant health and productivity (Berendsen et al., 2012; Compant et al., 2019; Wei et al.,

125 2019). Therefore, new switchgrass varieties with enhanced microbiome traits will be highly  
126 desirable.  $C_{27}$  core steroidal saponins ubiquitous in monocot plants (Moses et al., 2014) were  
127 documented in switchgrass in large amounts (Lee et al., 2009). Saponins containing either  
128 steroidal or triterpene ( $C_{30}$ ) cores were hypothesized to selectively modulate the growth of plant  
129 root microbiota (Moses et al., 2014; Huang et al., 2019). Beyond saponins, quercetin-derived  
130 flavonoids (Uppugundla et al., 2009) and biotic/abiotic stress-elicited  $C_{10} - C_{20}$  terpenes (Pelot et  
131 al., 2018; Muchlinski et al., 2019) were also detected in switchgrass.

132 This study developed and deployed approaches to analyze switchgrass metabolomes by  
133 untargeted LC-MS and targeted gas chromatography (GC)-MS. We documented specialized  
134 metabolite (including terpenoid glycosides and polyphenols) differences in the tiller, rhizome  
135 and root tissue of three upland and three lowland switchgrass cultivars at three developmental  
136 stages. These included 157 LC-MS features showing >1000-fold accumulation differences  
137 between the upland and lowland ecotypes. Steroidal saponins were especially abundant. Multiple  
138 forms of aglycones were identified, and their total root contents differed between the two  
139 ecotypes. Our study provides a comprehensive analysis of the specialized metabolites produced  
140 by different switchgrass cultivars, and sets the stage for developing dedicated bioenergy crops  
141 with varied plant and microbiome traits.

142

143

144

## Results

### 145 **Switchgrass untargeted metabolite profiling**

146 To characterize the metabolome of varied switchgrass genotypes at different developmental  
147 stages, LC-MS was used to profile metabolites extracted with 80% methanol across a sample  
148 panel containing three upland (Dacotah, Summer and Cave-in-Rock) and three lowland (Alamo,  
149 Kanlow and BoMaster) cultivars grown from seed in a controlled environment (**Materials and**  
150 **Methods**). Collection of the tiller (shoot), rhizome and root tissues was performed on plants at  
151 three developmental stages – vegetative, transition (between vegetative and reproductive) and  
152 early reproductive (**Materials and Methods, Fig S1 A**). In total, 6,240 distinct analytical signals  
153 (including multiple adducts from single analytes) were detected in positive mode from sample  
154 groups included in this study (**Fig S1 B**). This set was reduced to 4,668 features through a  
155 process of combining different adducts derived from the same analytes (see Methods).  
156 Downstream data analysis selected the 2586 of 4,668 with threshold maximum abundance  $\geq 500$   
157 (**Supplementary Dataset**). This is referred to as the ‘total detected features’ throughout this  
158 study.

159 We employed two complementary approaches to obtain evidence for classes of the features.  
160 First, Relative Mass Defect (RMD) filtering (Ekanayaka et al., 2015) was used to assign all  
161 metabolite signals to putative chemical classes (**Materials and Methods**). As a result, 42% and  
162 15% of the 2586 features in the dataset were annotated as terpenoid glycosides and polyphenol  
163 derived metabolites, respectively (**Fig 1A and Supplementary Dataset**). Then, we searched the  
164 MS<sup>1</sup> and MS<sup>E</sup> data in available online mass-spectral databases (**Materials and Methods**) and  
165 found strong matches to 169 previously characterized metabolites (**Supplementary Dataset**).

### 166 **Striking metabolome differences between tissue types, genotypes and developmental stages**

167 The untargeted metabolome data provide a high-level view of specialized metabolite variation  
168 among the samples, and broad patterns of variation were revealed using hierarchical clustering  
169 analysis (HCA, **Fig 1B**). The aerial (tiller) and subterranean tissue (root and rhizome)  
170 metabolites differed noticeably, consistent with the hypothesis that there are fundamental  
171 dissimilarities between the above- and below-ground tissue metabolomes. In contrast, the  
172 rhizome and root tissues were more similar to each other. Differences in metabolomes of the



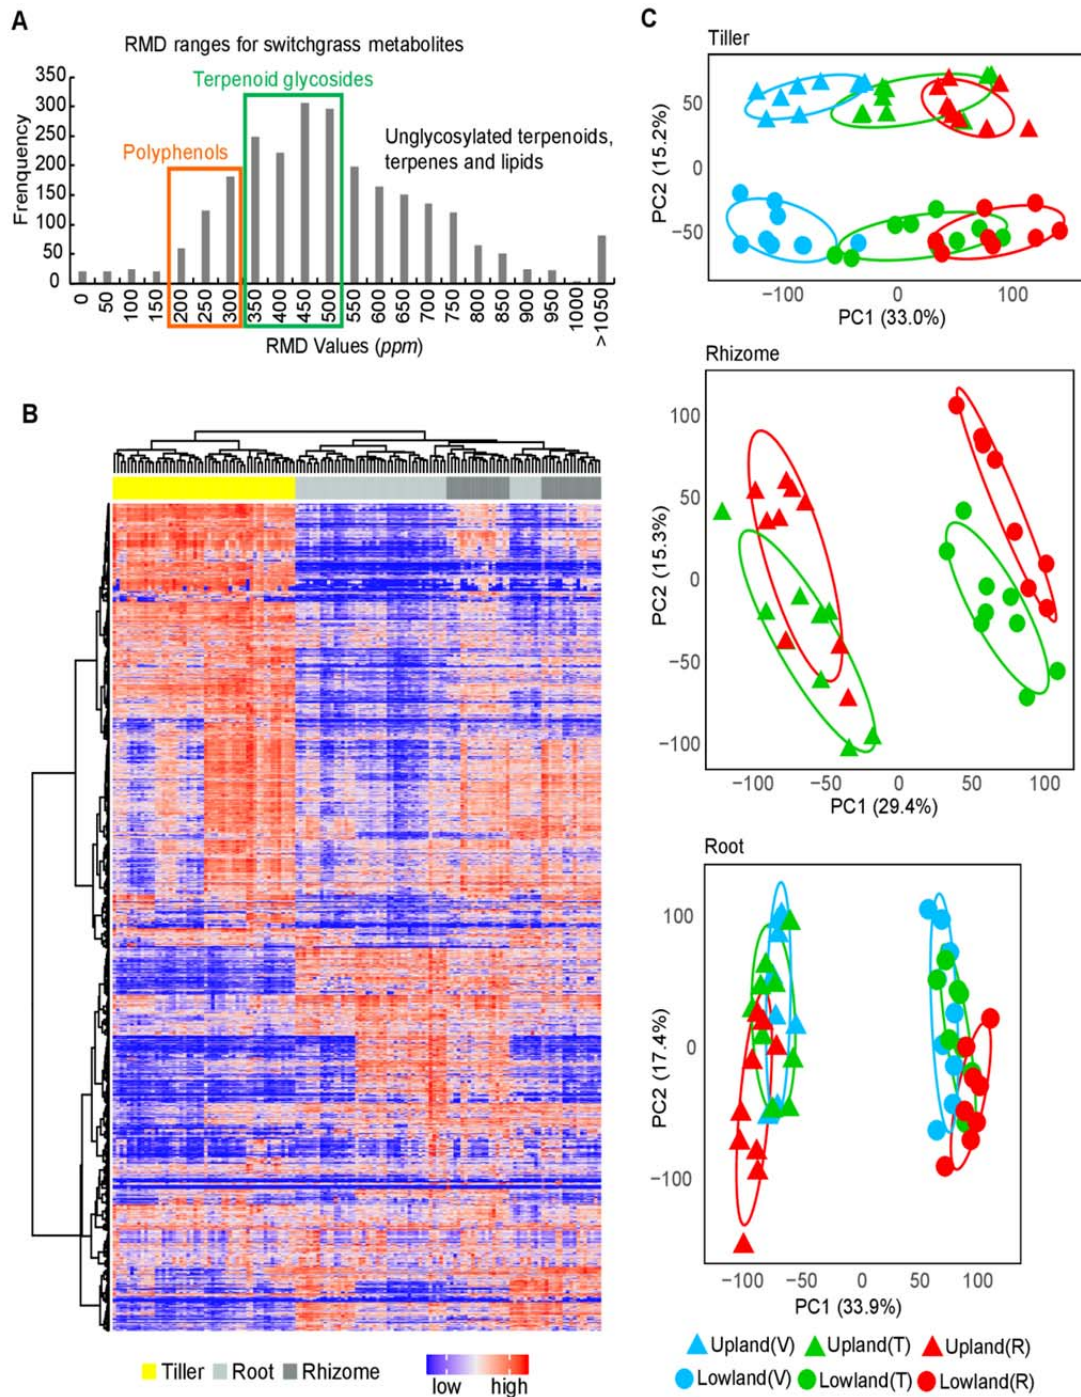

Figure 1. Untargeted metabolome profiling for switchgrass. (A) Histogram of RMD values for the total 2586 features detected in this study by LC-MS in positive ion mode. The green and orange rectangles highlight regions corresponding to the ranges of the RMD values anticipated for terpenoid glycosides and polyphenols, respectively. (B) The metabolome of the six switchgrass cultivars, three tissue types and three developmental stages shown by a heatmap with HCA. The row and column clusters symbolize the 2586 features and 48 sample groups (containing 139 individual samples), respectively. The values representing the metabolite abundances that were used to make the heatmap were scaled to a range from 0 (the lowest abundance) to 1 (the highest abundance). (C) PCA-score plots for the switchgrass tiller, rhizome and root metabolite profiles (n=8 for 'Upland Vegetative' and 'Lowland Reproductive'; n=9 for all the other groups). The percentage of explained variation is shown on the x- and y-axes. V, vegetative phase; T, transition phase; R, reproductive phase.



174 component analysis (PCA). Profiles of the tillers clustered into distinct groups in the PCA scores  
175 plot, corresponding with the upland (triangles) and lowland (circles) switchgrass ecotypes (**Fig**  
176 **1C, top panel**). Separation of the metabolite profiles was especially clear for different  
177 developmental stages (developmental stages are differentiated based on color in **Fig 1C, top**  
178 **panel**). The PCAs also showed clear-cut differences in metabolite profiles between the upland  
179 and lowland genotypes in both the rhizomes and roots (**Fig 1C, middle and bottom panels,**  
180 **respectively**). The developmental stage-associated variance in metabolite profiles of these two  
181 subterranean tissues was less apparent compared to that in the aerial tissue. Taken together, the  
182 PCA revealed large metabolite differences between the upland and lowland switchgrass cultivars  
183 of the three tissues across all three different developmental stages sampled.

#### 184 **Upland and lowland ecotypes have strikingly distinct metabolomes**

185 We next focused on each *developmental stage x tissue type* combination and identified the  
186 metabolite features that differentially accumulated in either upland or lowland ecotypes.  
187 Surprisingly, 25% (256 of 1035, **Table 1 and Supplementary Dataset**) of the features detected  
188 in extracts of the *vegetative-stage tillers* predominantly accumulated in one or the other  
189 switchgrass ecotype. Such features were termed as ecotype ‘differentially accumulated features’  
190 (DAFs). Specifically, there are 126 upland enriched and 130 lowland enriched DAFs in extracts  
191 of the *vegetative-stage tillers* (**Fig 2A and Table 1**). In comparison, analysis of *vegetative-stage*  
192 *roots* revealed a total of 879 features with 35% (310, **Table 1 and Supplementary Dataset**)  
193 meeting the ecotype DAF statistical threshold (**Fig 2B**). Of these 310 DAFs, approximately equal  
194 numbers of features were found to be either upland- (149) or lowland- (161) enriched (**Table 1**).  
195 DAFs were also identified for the other *developmental stage x tissue type* combinations (**Fig S2**  
196 **A-F, Table 1 and Supplementary Dataset**). Altogether, 1416 unique ecotype DAFs were  
197 identified for the eight *developmental stage x tissue type* combinations included in this study (**Fig**  
198 **2C and Supplementary Dataset**), accounting for approximately half of the features in the full  
199 dataset. These include 770 DAFs predominantly accumulated in upland and 646 predominantly  
200 accumulated lowland DAFs (**Fig 2C inset barplot**). Based on RMD filtering 46% and 13% of  
201 the DAFs were predicted to be terpenoid glycosides (**Fig 2 A-B and Fig S2 A-F, green dots**)  
202 and polyphenol-derived metabolites (**Fig 2 A-B and Fig S2 A-F, orange dots**) respectively.

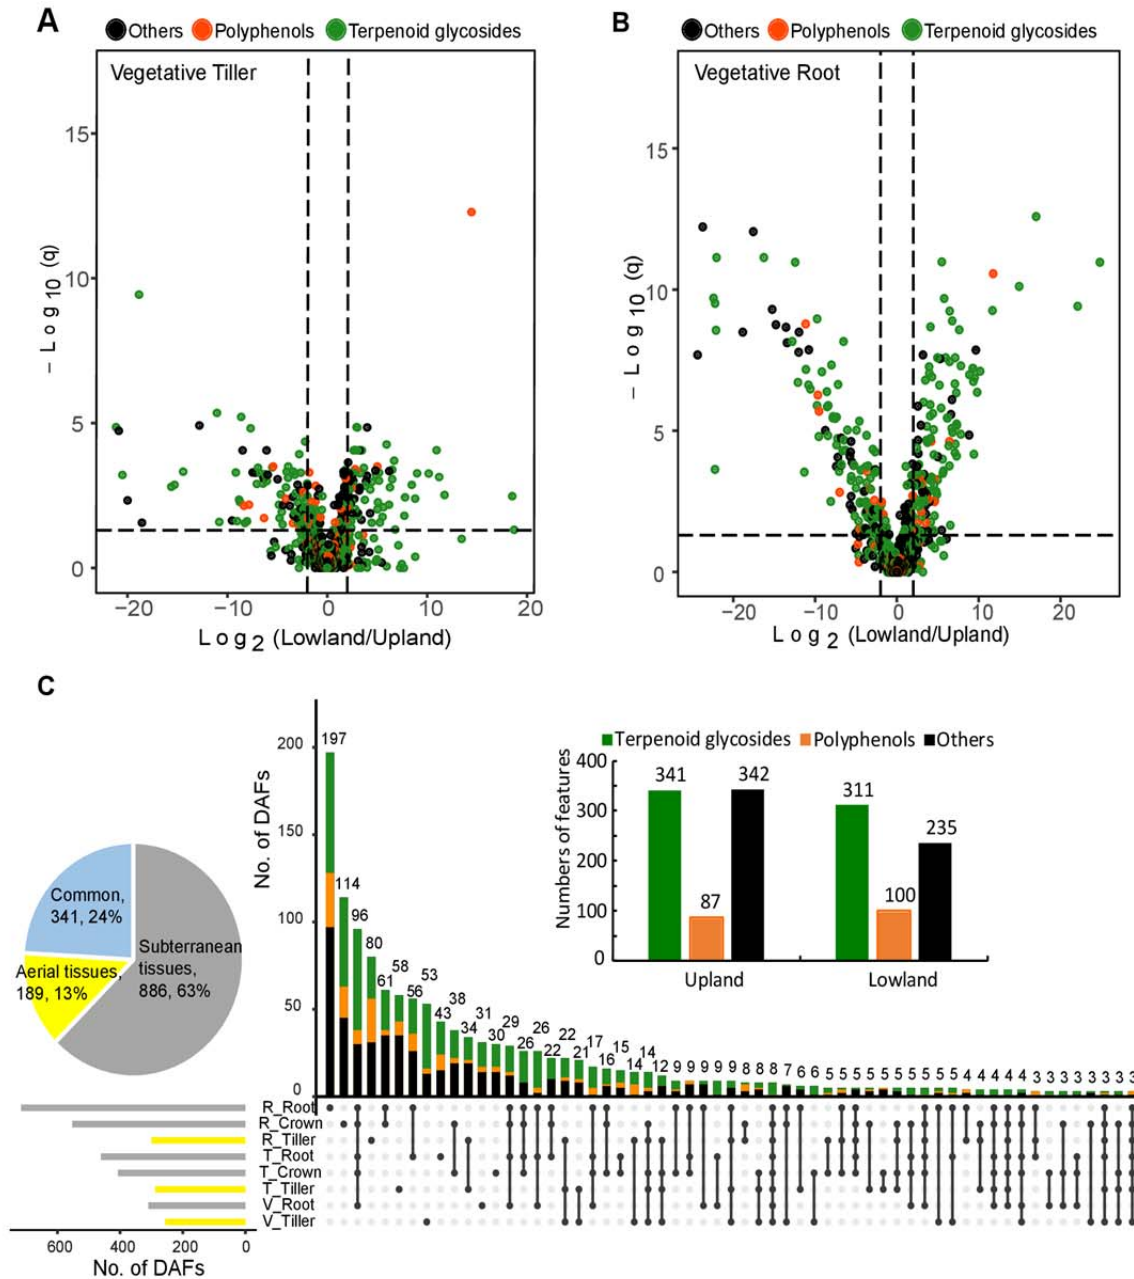

Figure 2. Differentially accumulated features (DAFs) were identified between the upland and lowland ecotypes. Significance analysis (cutoff threshold: adjusted P-value  $\leq 0.05$ ; fold changes  $\geq 2$ ) was performed to screen for the DAFs between the upland and lowland switchgrass ecotypes ( $n = 8$  or  $9$ ) in various developmental stage x tissue type samples. Results of the analyses for (A) vegetative-stage tillers and (B) vegetative-stage roots are shown here using volcano plots. Putative terpenoid glycosides, polyphenols and metabolites from the other categories were classified using RMD filtering and the results color coded. (C) In total, 1416 unique (non-overlapping) ecotype DAFs were identified for the eight developmental stage x tissue type combinations. The inserted barplot shows that upland and lowland ecotypes accumulated similar numbers of the predominant DAFs likely terpenoid glycosides (green) and polyphenols (orange). The inserted pie chart indicates percentages of the DAFs contributed by aerial (tiller) vs. subterranean (root/rhizome) tissues.

203 A striking result from this analysis is that 11% (157) of the 1416 DAFs showed >1000-fold

204 accumulation difference between the two ecotypes in at least one of the eight *developmental*  
205 *stage x tissue type* combinations, including a few organic acids, sesquiterpenoids and phenolics  
206 identified by database searching (**Supplementary Dataset**). Noticeably, 82% (129/157) of these  
207 highly DAFs were unique to subterranean tissues (rhizome and/or root). A similar, but less  
208 striking, result was seen for the total 1416 DAFs: 63% (886) were only found in subterranean  
209 tissues while only 13% (189) were unique to the aerial tissues. The remaining 24% were detected  
210 in both above- and below-ground tissues (**Fig 2C inset pie chart**). These results suggest that  
211 switchgrass subterranean tissues are the major sources of the specialized metabolic genetic  
212 diversity.

### 213 **Examples of large ecotype and tissue differences in switchgrass specialized metabolites**

214 A striking feature of our large dataset is the observation that some metabolites show >1000-fold  
215 differences between ecotypes or tissues. This is especially noticeable for features annotated as  
216 saponins based on our four criteria (**Materials and Methods**), where we observed 21 unknown  
217 DAFs with >1000-fold accumulation difference between ecotypes. As an example of the saponin  
218 feature annotation, **Fig 3A** shows a portion of chromatogram that is rich in terpenoid glycosides  
219 and polyphenols. The HPLC peak eluting at 6.09 min was the most abundant saponin-like feature  
220 in diverse switchgrass samples included in this study. The MS<sup>1</sup> spectrum of this feature showed  
221  $[M + NH_4]^+$  at  $m/z$  1212 (**Fig 3A**),  $[M - H_2O]^+$  at  $m/z$  1177 (**Fig 3B right panel**) and  $[M + H]^+$  at  
222  $m/z$  1195 (not shown). The (MS<sup>E</sup>) fragment mass spectra (**Fig 3B right panel**) revealed ions  
223 consistent with two sequential losses of 162 Da (each interpreted as glucose minus H<sub>2</sub>O) and  
224 three neutral losses of 146 Da (interpreted as losses of three anhydro-rhamnose units). A fragment  
225 ion (C<sub>27</sub>H<sub>43</sub>O<sub>3</sub><sup>+</sup>) at  $m/z$  415 with an RMD value of 795 ppm was also detected (**Fig 3B right**  
226 **panel**), matching the molecular formula of protonated diosgenin (C<sub>27</sub>H<sub>42</sub>O<sub>3</sub>, 414 Da) as  
227 described by Lee et al. (2009). Based on the interpretation of the MS data, we proposed a  
228 putative structure of this saponin (**Fig 3B right panel**).

229 In total, we identified 176 distinct saponin-like features (**Supplementary Dataset**) with four  
230 different core fragment ion masses (**Table S1**). To compare abundances of these saponin-like  
231 features across the switchgrass samples, ion current intensities (peak areas) of the 176 features  
232 were combined and termed as the ‘total saponin’. The right panel in **Fig 3C** shows that roots of  
233 the lowland ecotype accumulated more total saponin than the upland roots at all three

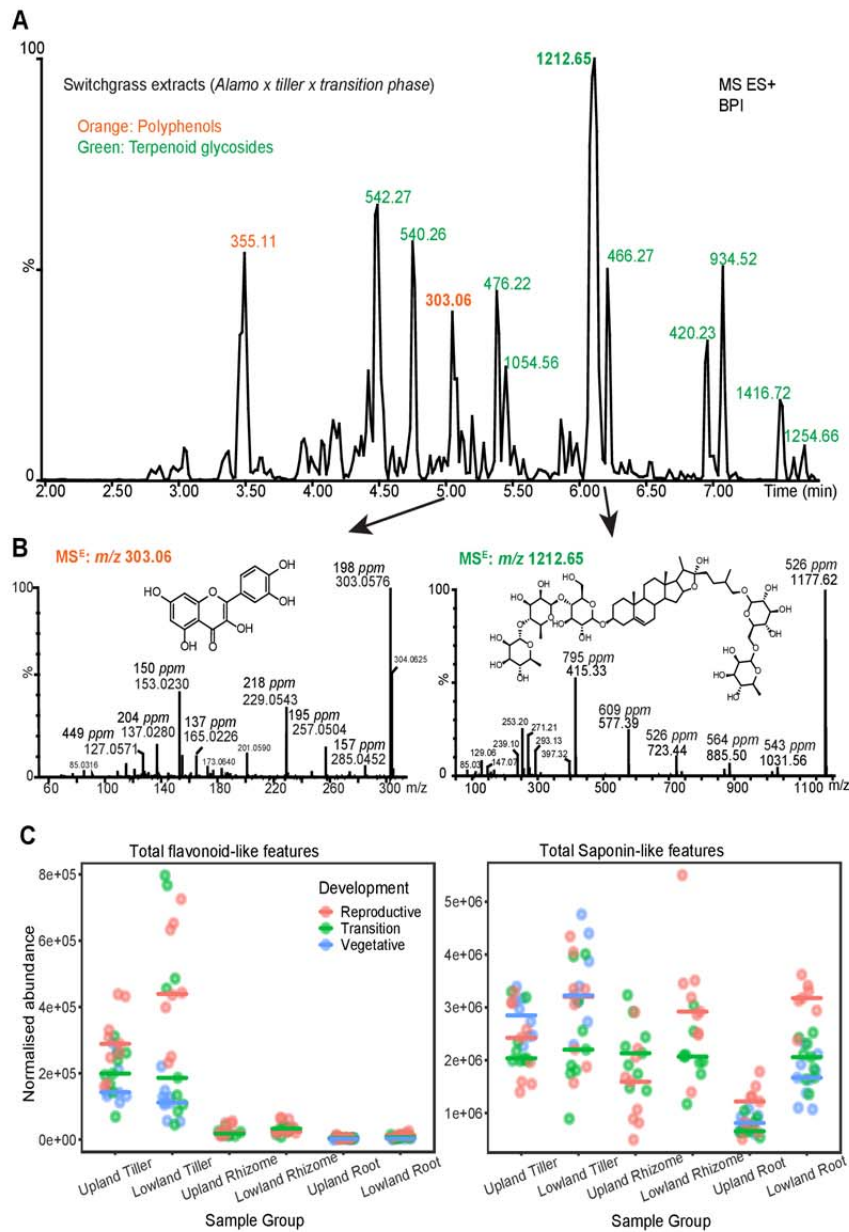

Figure 3. Saponins, terpenoid glycosides and polyphenols (e.g. flavonoids) dominate switchgrass extracts (A) A portion of LC-MS base peak intensity (BPI) chromatogram rich in saponins, terpenoid glycosides and phenolics. This BPI chromatogram was generated from the extracts of the transition-stage tillers of lowland switchgrass, Alamo. The numbers on tops of the peaks are m/z values of the most abundant features in the peaks (Green text, terpenoid glycosides; Orange text, polyphenols). (B) High energy MSE fragmentation pattern of the m/z 1212 saponin was shown in the right panel. The fragment ions (spectra) that are thought to be derived from the fully glycosylated saponin are labeled with their RMD values (upper numbers in ppm). A putative structure of this saponin is shown in the inset. The MSE fragmentation pattern of the m/z 303 quercetin was shown in the left panel. The m/z 127, 153 and 165 were derived from the A ring. The m/z 137 was derived from the B ring. The m/z 229, 257 and 285 correspond to  $[M+H-H_2O-2CO]^+$ ,  $[M+H-H_2O-CO]^+$  and  $[M+H-H_2O]^+$  respectively. (C) Relative quantification for the sum of saponin-like (right) and flavonoid-like (left) features in each genotype x developmental stage x tissue type class (n = 8 or 9). Colored horizontal bars represent median values. Normalized abundances (y-axis) were calculated as (ion intensity of the feature / ion intensity of the internal standard) x 1000.

234 developmental stages. In contrast, rhizomes of the lowland ecotypes accumulated more total



235 saponin than the upland rhizomes only at the reproductive stage (**Fig 3C right panel**). Ecotype-  
236 specific differences were not observed in aerial tissue: tillers of the two ecotypes accumulated  
237 comparable amounts of total saponins across development stages, (**Fig 3C right panel**).

238 Switchgrass extracts are also rich in polyphenol derived metabolites, such as quercetin-type  
239 flavonoids (Uppugundla et al., 2009). Twenty-three flavonoid-like features (**Supplementary**  
240 **Dataset**) were identified in our dataset, including abundant quercetin aglycone (eluting at 5.05  
241 min with molecular ion of  $m/z$  303.06; **Fig 3B left panel**). As was done for saponins features, we  
242 analyzed differences in total flavonoids across *ecotype x developmental stage x tissue type*  
243 combinations. In contrast to total saponins, both switchgrass ecotypes have higher total  
244 flavonoids in tillers than rhizomes and roots (**Fig 3C, left panel**). Flavonoids displayed weaker  
245 ecotype-specific differences and only in the *reproductive-stage tillers* as a result of a few outlier  
246 lowland samples. These accumulated unusually high levels of total flavonoids (**Fig 3C left**  
247 **panel**).

#### 248 **Evidence for multiple switchgrass saponin cores**

249 The LC-MS results revealed that the saponins are highly differentially accumulated between the  
250 two switchgrass ecotypes. To more precisely determine saponin concentrations in different  
251 tissues and switchgrass cultivars, a GC-MS based quantification method was developed to  
252 quantify the sugar-free sapogenin aglycones in a panel of switchgrass samples after hydrolytic  
253 removal of sugars (**Materials and Methods**). Because saponins based on the diosgenin core  
254 were reported in switchgrass extracts (Lee et al., 2009), commercial diosgenin was used as an  
255 external quantification standard. This method detected three distinct diosgenin-derived peaks  
256 (D1, D2 & D3, **Fig 4A top trace, Fig S4A top trace and Table 2**) from the commercial  
257 standard with D2 as the major peak. We hypothesize that D3 is a less abundant diosgenin  
258 structural isomer and D1 a dehydrated diosgenin that formed during sample treatment. Identities  
259 of these peaks were inferred from their putative pseudomolecular ions from chemical ionization  
260 (CI) MS (**Fig 4B**) and fragment ions from electron ionization (EI) MS (**Fig S4B**). A search of the  
261 EI mass spectra against National Institute of Standards and Technology (NIST) NIST17 GC-MS  
262 library ([www.chemdata.nist.gov](http://www.chemdata.nist.gov)) confirmed these compounds as diosgenin (**Fig S4C**).

263 Hydrolysis and derivatization of switchgrass samples yielded six potential sapogenin peaks in  
264 GC-MS chromatograms (S1 – S6, **Fig 4A and Fig S4A**). Based on their putative

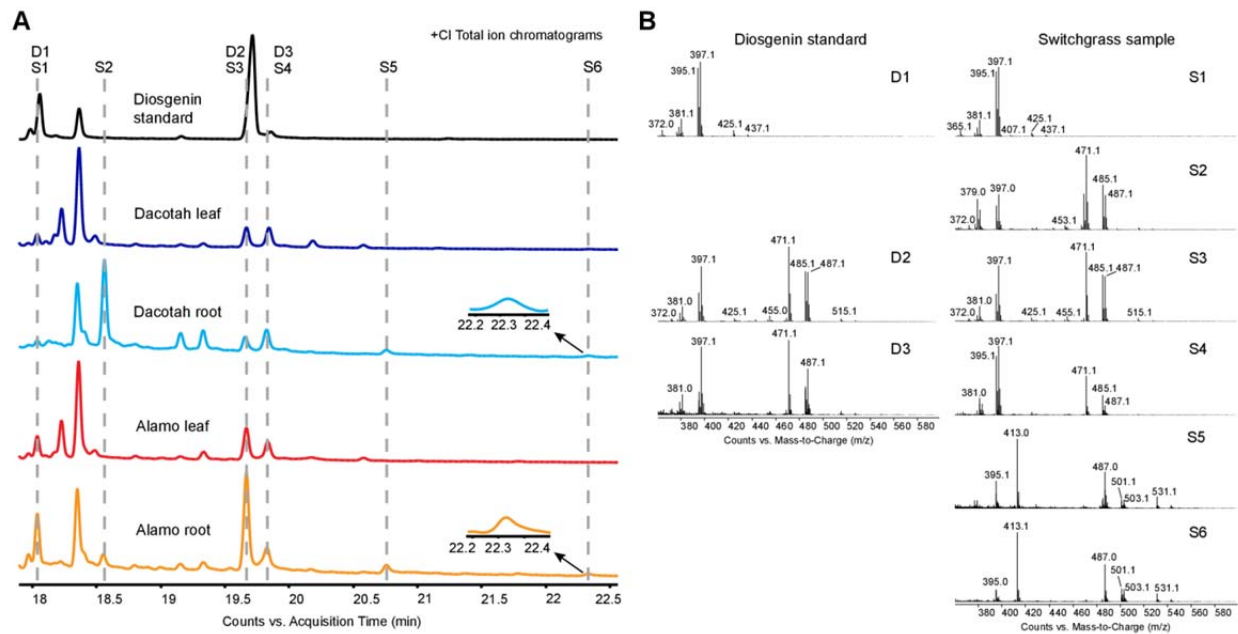

Figure 4. Potential sapogenin peaks were identified in switchgrass extracts by GC-MS. (A) +CI GC-MS total ion chromatograms (TICs) of diosgenin standard (black), Dacotah leaf (dark blue), Dacotah root (blue), Alamo leaf (red) and Alamo root (orange). The identified potential sapogenin peaks in the switchgrass and standard samples are indicated and aligned by the dashed lines. Note that the S1, S3 and S4 peaks in all switchgrass samples have slightly different RTs from the D1, D2 and D3 peaks correspondingly in the diosgenin standard sample (black). Zoomed-in views for the peak S6 in Dacotah root and Alamo root are indicated by the arrows. (B) The (CI) GC-MS spectral patterns of the sapogenin peaks detected in the standard and switchgrass samples.

265 pseudomolecular ions (**Fig 4B**) and fragmentation patterns (**Fig S4B**), we annotated S2, S3 and  
266 S4 as diosgenin structural isomers, while S5 and S6 were annotated as oxydiosgenin, which  
267 contains one more oxygen than diosgenin. As with D1 in the standard, S1 appears to be a  
268 dehydrated diosgenin that formed during sample treatment (**Table 2**). Among these six  
269 switchgrass sapogenins, S3 and S4 elute close to each other and have a slightly different  
270 retention index compared with D2 and D3, respectively. In contrast, diosgenin isomer S2 has a  
271 retention index distinctly shorter than S3 and S4 (**Fig 4A**, **Fig S4A** and **Table 2**). The two  
272 oxydiosgenin isomers, S5 and S6, were below the limit of detection in the diosgenin standard  
273 sample. Altogether, these results provide evidence that the substantial chemical diversity in >100  
274 saponins observed by LC-MS is the result of variable glycosylation of at least five different  
275 switchgrass sapogenin cores.

## 276 Confirmation of differential accumulation of sapogenins in roots of the two ecotypes

277 Results of GC-MS quantification revealed ecotype-specific sapogenin profiles in subterranean  
278 tissues (**Table S2**). This is easily visualized in the GC-MS HCA heatmap in **Fig 5A**, where all



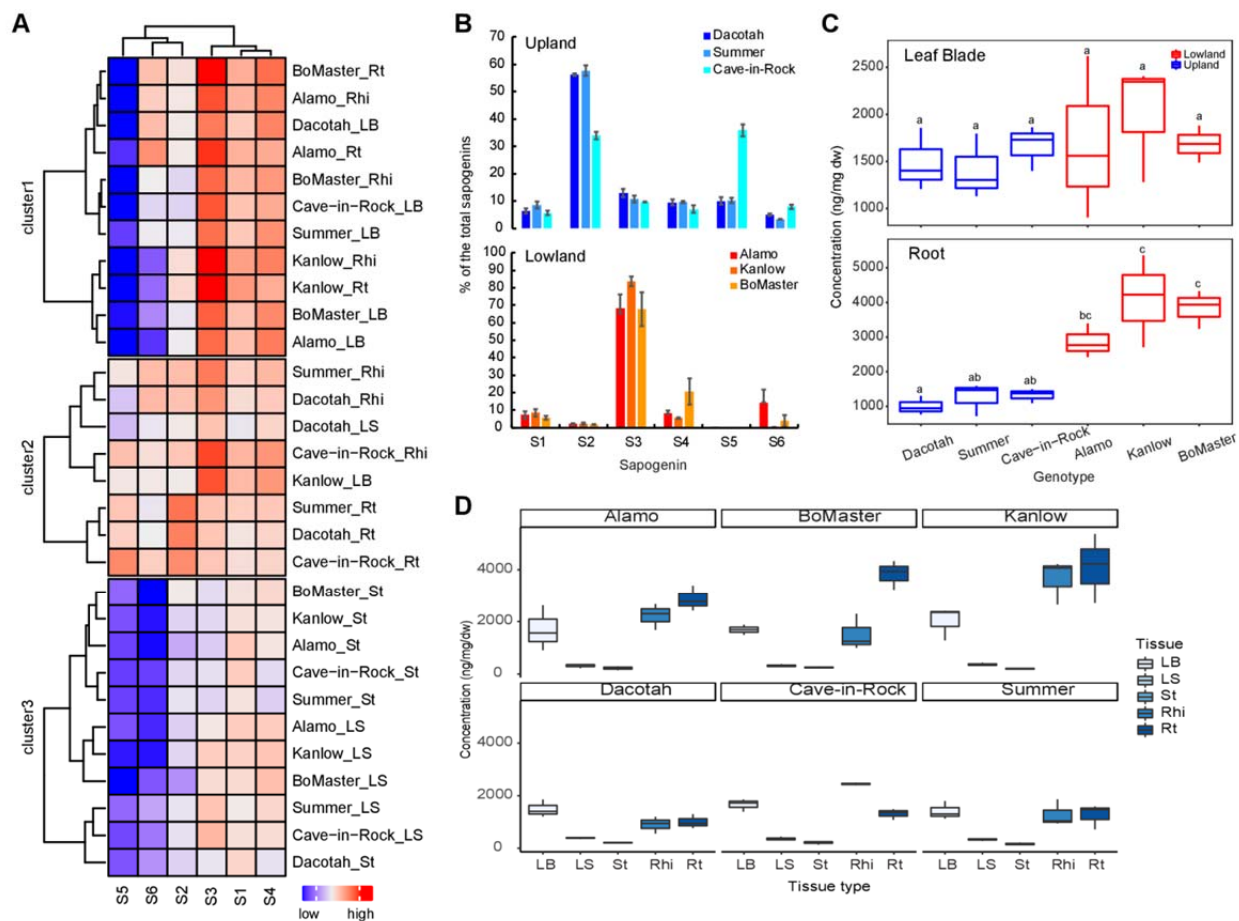

Figure 5. Variations in sapogenin concentrations among the switchgrass genotypes, tissue types and genotype x tissue type. (A) A heatmap with HCA generated using data from Table S2 showing a profile of concentrations of the individual sapogenins in the different genotype x tissue type combinations. The concentration values were log<sub>10</sub> scaled to a range between 0 (lowest) and 4 (highest). (B) The ratio of the individual sapogenins in roots of the three upland and three lowland switchgrass cultivars. Heights of the bars reflect the means of the three replicates for individual cultivars; error bars show the standard error of the mean. (C) Comparison of the total sapogenin among the six switchgrass cultivars in leaf blade (Kruskal-Wallis test:  $P = 0.766$ ) and root (Kruskal-Wallis test,  $P = 0.016$ ). Different lower-case letters on top of the boxes designate statistically different means (Post-Hoc test: Dunn's test). (D) Comparison of the total sapogenin concentrations among the five tissue types for each switchgrass cultivar. LB, leaf blade; LS, leaf sheath, St, stem; Rhi, rhizome; Rt, root.

279 subterranean lowland ecotype samples clustered in clade 1, while those of the upland ecotype fall  
 280 into clade 2. S3 was dominant in roots of the lowland cultivars, representing three-quarters of the  
 281 total sapogenin, while S2 accounted for half of sapogenins in upland cultivars roots (**Fig 5B**). In  
 282 contrast, aerial samples displayed tissue-specific relationships across ecotypes: samples from leaf  
 283 blade (except Kanlow) in clade 1 and sheath and stem (except Dacotah) in clade 3 (**Fig 5A**).  
 284 Taken together, these results support the LC-MS metabolomics data indicating that the ecotype-  
 285 specific metabolite differences are greatest in subterranean tissues (**Fig 2 and Fig S2**).

286 This conclusion was reinforced by analysis of total sapogenin concentrations in tissues of upland  
287 vs. lowland switchgrass (**Table S2**). **Fig 5C** (lower panel) shows that the total sapogenins in  
288 lowland roots are uniformly higher than those in roots of the three upland cultivars, with Kanlow  
289 and BoMaster showing statistical significance ( $p < 0.05$ , Kruskal-Wallis test). However, leaf blade  
290 total sapogenins revealed no ecotype-related statistical difference (**Fig 5C upper panel**). Total  
291 sapogenin concentrations were also compared across tissue types for each switchgrass cultivar  
292 (**Fig 5D**). Comparable total sapogenins were found in leaf blades and roots of the three upland  
293 cultivars - Dacotah, Summer and Cave-in-Rock (**Fig 5D lower panel**). By contrast, total root  
294 sapogenins were higher than those found in leaf blades of all three lowland cultivars (**Fig 5D**  
295 **upper panel**). Taken together, quantitative analysis of sapogenin cores supports the results of  
296 LC-MS untargeted metabolomics profiling showing strong genetic difference in root saponin  
297 abundance.

298

299

300

## Discussion

301 Switchgrass is a compelling low-fertilizer and low-pesticide cellulosic bioenergy crop candidate  
302 (Sanderson et al., 2006), which has strong tolerance to marginal conditions, such as low soil  
303 fertility and drought. An especially compelling characteristic is the characterization of two  
304 principal ecotypes with populations that vary in phenotypes such as biomass production,  
305 flowering time and cold tolerance between the two principal ecotypes (Casler et al., 2015). Our  
306 results show a strong divergence in metabolite profiles of accessions in the upland and lowland  
307 ecotypes, which sets the stage for identifying metabolites involved in local adaptation of  
308 switchgrass. As an example, we found that steroidal saponins – a class of glycosylated plant  
309 specialized metabolites – are abundant and differentially accumulated in roots of upland and  
310 lowland ecotypes. Plant specialized metabolites are documented to play important roles in  
311 recruiting beneficial microorganisms and combating harmful microbes (Massalha et al., 2017).  
312 Our study suggests an opportunity to test the bioactivities of the saponins and potentially other  
313 differentially accumulated metabolites in interactions between switchgrass and their  
314 microbiomes, which would inform the development of locally adapted switchgrass varieties.

### 315 **Switchgrass extracts contain abundant terpenoid glycosides and polyphenols**

316 We used a combination of LC-MS based untargeted metabolite fingerprinting and *de novo*  
317 feature-annotation (RMD filtering) to investigate switchgrass metabolites from three upland and  
318 three lowland cultivars. The samples were collected in different *developmental stages x tissue*  
319 *type* combinations for a total of 48 contrasts. Approximately 42% and 15% of the total detected  
320 features in the dataset are annotated as terpenoid glycosides and polyphenol-derived metabolites  
321 including flavonoids, respectively. The remaining features fell into other categories such as  
322 sugars and lipids. Before this survey, there were relatively few published studies about  
323 switchgrass metabolites. Leaf steroidal saponins were identified in switchgrass and other  
324 *Panicum* species in the 1990's as a cause of hepatogenous photosensitization in farm animals  
325 (Patamalai et al., 1990; Holland et al., 1991; Puoli et al., 1992; Munday et al., 1993).  
326 Switchgrass, along with other monocot crops including wheat, rice and maize, are also known to  
327 produce diterpenoid-derived antimicrobial phytoalexins (Murphy & Zerbe, 2020). In addition to  
328 these terpenoids, polyphenols such as quercitrin (flavonoids), were also documented in

329 switchgrass (Uppugundla et al., 2009). Our metabolomics analysis confirms and extends these  
330 published results.

### 331 **Above- vs. below-ground switchgrass metabolomes**

332 The switchgrass above- and below-ground tissues were shown to have distinct metabolite  
333 profiles (**Fig 1B**) by untargeted metabolomics. The analysis also revealed that metabolomes of  
334 the above- and below-ground switchgrass tissues are differently influenced by developmental  
335 stages. There are clear differences in metabolite profiles of tillers across the three developmental  
336 stages (**Fig 1C, top rectangle**). In comparison, metabolite profiles of rhizomes and roots are  
337 similar to each other across developmental stages (**Fig 1C, middle and bottom rectangles**).  
338 Metabolic changes in perennial grass belowground tissues are especially important during the  
339 start and end of the growing season. For example, in the spring nutrients are mobilized to the  
340 shoot to promote early growth, and the reverse occurs going into dormancy (Palmer et al., 2017).  
341 As there are documented genetic differences in winter survival between upland and lowland  
342 varieties, it is of interest to investigate genotype-specific metabolome differences during these  
343 physiologically dynamic periods.

### 344 **Divergence in metabolomes of upland and lowland ecotypes**

345 We identified 1416 DAFs between the upland and lowland ecotypes, where >60% are  
346 exclusively from subterranean tissues (**Fig 2C**). These ecotype DAFs make up more than half of  
347 the total detected features. Strikingly, 157 of the 1416 DAFs show > 1,000-fold accumulation  
348 difference between the two ecotypes. In contrast, results of a metabolomics analysis for maize  
349 showed that metabolite profiles of the six genetically defined populations from a GWAS panel  
350 failed to separate in PCA, even when the metabolite data were independently analyzed within the  
351 same tissue type (Zhou et al., 2019). The strong divergence in metabolomes between the two  
352 switchgrass ecotypes provides abundant genetic diversity that could be deployed to breed locally  
353 adapted varieties (Casler et al., 2015; Lowry et al., 2019).

354 Ecotype divergence between upland and lowland switchgrass was previously documented for  
355 many plant traits including flowering time, plant size, physiological processes and disease  
356 resistance (Milano et al., 2016). The genetic architectures of these divergent traits are being  
357 analyzed using quantitative trait locus (QTL) mapping and whole genome association studies

358 (GWASs) (Milano et al., 2016; Grabowski et al., 2017; Lowry et al., 2019). Among these,  
359 disease resistance is related to plant specialized metabolism in other well-studied systems. For  
360 example, avenacins (triterpenoid saponins) protect oats (*Avena spp.*) from the soilborne fungal  
361 pathogen, *Gaeumannomyces graminis* var. *tritici*, which causes the ‘take-all’ disease (Osbourn et  
362 al., 1994). It is known that the lowland ecotype is more resistant to rust infections than the  
363 upland ecotype (Uppalapati et al., 2013; VanWallendael et al., 2020). Given the divergence  
364 between upland and lowland switchgrass metabolomes, the metabolome-based QTL or GWAS  
365 might be useful for the discovery of specialized metabolites and corresponding biosynthetic  
366 genes/pathways involved in rust resistance of the lowland switchgrass.

### 367 **Chemical diversity and ecotype-specific accumulation of switchgrass saponins**

368 Saponins stand out as a class of highly abundant switchgrass metabolites. The GC-MS analysis  
369 identified six different steroidal sapogenins, including an anhydrodiosgenin (S1), three diosgenin  
370 isomers (S2, S3 and S4) as well as two oxydiosgenin isomers (S5 and S6) that were not  
371 previously reported in the switchgrass literature (**Table 2**). Diosgenin and oxydiosgenin  
372 explained two of the four sapogenin core masses detected by LC-MS analysis ( $m/z$  415 and 431,  
373 respectively, **Table S1**). Despite the abundance of glycosylated triterpene and larger steroidal  
374 saponins in LC-MS analysis, we did not obtain evidence for corresponding sapogenin core  
375 masses ( $m/z$  455 and 457, **Table S1**) in our GC-MS analysis. This is probably due to the lack of  
376 standards for these sapogenins.

377 Glycosylation strongly contributes to the substantial chemical diversity of switchgrass saponins.  
378 Differences in glycosylation of only about five sapogenin cores lead to more than 100 distinct  
379 saponin-like features ranging from 800 to 1400 Da. This glycosylation diversity comes from the  
380 composition, quantity and position of oligosaccharide chains. The most common  
381 monosaccharides in saponin sugar chains are glucose, galactose, arabinose, rhamnose, xylose  
382 and glucuronic acid (Thimmappa et al., 2014). Neutral losses corresponding to anhydrous  
383 glucose/galactose and rhamnose that associate with switchgrass saponins (under the high  
384 dissociation-energy MS<sup>E</sup> mode) were observed in this study. Glycosylation increases polarity of  
385 saponins and is often associated with bioactivity (Thimmappa et al., 2014).

386 Total saponins show an ecotype-specific accumulation in switchgrass roots (**Fig 3C right panel**  
387 **and Fig 5C lower panel**). The average saponin concentrations in roots of three upland cultivars,

388 Dacotah, Summer and Cave-in-Rock, are 1.0, 1.3 and 1.3 mg/mg of dw, respectively. The  
389 average saponins in roots of three lowland cultivars, Alamo, Kanlow and BoMaster, are  
390 statistically higher, at 2.9, 4.1 and 3.8 mg/mg of dw respectively (**Table S2**). These root saponin  
391 contents are intermediate between previously studied plants. On the one extreme, cereals and  
392 grasses are generally deficient in saponins, with some exceptions such as oat, which accumulates  
393 both triterpenoid and steroidal saponins (Osbourn, 2003). Legumes fall at the other extreme:  
394 *Medicago truncatula* (Huhman et al., 2005) and two *Medicago sativa* cultivars, Radius (Bialy et  
395 al., 1999) and Kleszczewska (Oleszek et al., 1990), contain 5.9, 5.0 and 9.3  $\mu\text{g}/\text{mg}$  dw saponins  
396 in their roots, respectively. The availability of cultivars with different root saponins makes  
397 switchgrass an attractive target for understanding the bioactivity of these specialized metabolites.  
398 A comparative metatranscriptomics study (Turner, et al., 2013) revealed strong rhizosphere  
399 microbiome differences among crops: the cereal wheat did not accumulate detectable saponin,  
400 the cereal oat produced anti-fungal avenacin saponins, the legume pea produced large amounts  
401 of triterpenoid saponins, as well as in an oat mutant deficient in avenacin production. Thus,  
402 differential saponin accumulation in switchgrass roots may be indicative of microbiome-  
403 modulator activities of these compounds.

#### 404 **Conclusion**

405 Our metabolomics survey of switchgrass revealed differences across tissue types, developmental  
406 stages and cultivars. The results provide evidence for especially large divergence in  
407 metabolomes of the upland and lowland switchgrass ecotypes. Particularly, steroidal saponins  
408 differentially accumulated in roots of upland and lowland ecotypes, consistent with potential  
409 microbiome-modulator activities of these compounds. Altogether, our analysis offers a starting  
410 place to identify targets for plant breeding or metabolic engineering that may select for adaptive  
411 microbiomes and will be useful for development of locally adapted switchgrass varieties with  
412 increased biomass yield and decreased economically- and environmentally-costly inputs.

413

## 414 **Materials and Methods**

### 415 **Plant materials**



416 The xix switchgrass cultivars used in this study were the upland ecotypes Dacotah, Summer and  
417 Cave-in-Rock and lowland ecotypes Alamo, Kanlow and BoMaster. The seeds were ordered  
418 from Native Connections (<http://nativeconnections.net>, Three Rivers, MI). The plants were  
419 grown under controlled growth conditions: temperature set at 27 °C with 16 h light (500  $\mu\text{E m}^{-2}\text{s}^{-1}$ )  
420 per day and relative humidity set to 53%. Seeds were sown directly in a 1:1 mixture of sand  
421 and vermiculite, watered twice a week with deionized water and fertilized once every two weeks  
422 using half-strength Hoagland's solution (Hoagland & Arnon, 1950).

423 For untargeted LC-MS analysis, plant tissues were harvested at one-, two- and three-months after  
424 imbibition, corresponding to the vegetative, transition and early reproductive developmental  
425 stages, respectively. Roots, rhizomes and tillers (a portion of stem with several leaves, **Fig S1 A**)  
426 were collected separately for all the switchgrass cultivars. For example, one sample represented a  
427 specific *cultivar (genotype) x developmental stage x tissue type* combination (**Fig S1 B**). There  
428 were three biological replicates from three independent plants with two exceptions: two samples  
429 each from two independent plants for vegetative phase Cave-in-Rock samples and early  
430 reproductive phase Alamo samples. For the GC-MS quantification of sapogenins, samples were  
431 only collected from the 3-month-old (early reproductive phase) plants. All samples were  
432 immediately frozen in liquid nitrogen and stored at -80 °C until extraction.

### 433 **Metabolite extraction**

434 All chemicals were obtained from Sigma Aldrich (St. Louis, MO) unless otherwise specified.  
435 The samples were frozen in liquid nitrogen and powdered using 15-mL polycarbonate grind vial  
436 sets (OPS Diagnostics, Lebanon, NJ) on a Mini G high throughput homogenizer (SPEX  
437 SamplePrep, Metuchen, NJ). 500 mg of each sample was extracted at 4 °C overnight (14 – 16  
438 hours) in 5 mL of 80% methanol containing 1  $\mu\text{M}$  telmisartan internal standard. Extracts were  
439 centrifuged at 4000 g for 20 min at room temperature to remove solids. Supernatant from each  
440 sample was transferred to an HPLC vial and stored at -80 °C prior to LC-MS analysis. For GC-  
441 MS, 50 mg of lyophilized sample was extracted in 1 mL of 80% methanol following the  
442 workflow described for LC-MS sample preparation above, as described by Tzin et al. (2019).

### 443 **UPLC-ESI-QToF-MS analysis**

444 Reversed-phase Ultra Performance Liquid Chromatography – Positive Mode Electrospray  
445 Ionization – Quadrupole Time-of-Flight MS (UPLC-(+)ESI-QToF-MS) analyses were performed  
446 with a Waters Acquity UPLC system coupled to a Waters Xevo G2-XS quadrupole time-of-  
447 flight (QToF) mass spectrometer (Waters, Milford, MA). The chromatographic separations were  
448 performed using a reversed-phase, UPLC BEH 1.7  $\mu\text{m}$  C18, 2.1 mm x 150 mm column (Waters)  
449 with a flow rate of 0.4 mL/min. The mobile phase consisted of solvent A (10 mM ammonium  
450 formate/water) and solvent B (100% acetonitrile). The column oven was maintained at 40 °C.  
451 Separations were achieved utilizing a 20-min method, injecting 10  $\mu\text{L}$  of extract and using the  
452 following method (%A/%B): 0-1.0 min hold (99/1), linear gradient to 15 min (1/99), hold (1/99)  
453 until 18 min, returning at 18.01 min (99/1) and holding until 20 min. The Xevo G2-XS QToF  
454 was operated using the following static instrument parameters: desolvation temperature of 350  
455 °C; desolvation gas flow rate at 600 L/h; capillary voltage of 3.0 kV; cone voltage of 30 V. Mass  
456 spectra were acquired in continuum mode over  $m/z$  50 to 1500 using data-independent  
457 acquisition (DIA) and MS<sup>E</sup>, with collision potential scanned between 20 – 80 V for the higher-  
458 energy function. The MS system was calibrated using sodium formate, and leucine enkephalin  
459 was used as the lock mass compound but automated mass correction was not applied during data  
460 acquisition. QC and reference samples were analyzed every 20 injections to evaluate the stability  
461 of the LC-MS system.

#### 462 **Data processing and metabolite mining for the untargeted metabolomics analysis**

463 Acquired raw MS data were processed using the Progenesis QI software package (v.3.0, Waters,  
464 Milford, MA) using retention time (RT) alignment, lock mass correction, peak detection, adduct  
465 grouping and deconvolution. The identified compounds were defined by the RT and  $m/z$   
466 information and we also refer to these as *features*. The parameters used with Progenesis  
467 processing were as follows: sensitivity for peak picking, default; minimum chromatographic  
468 peak width, 0.15 min and RT range, 0.3 to 15.5 min. Intensities (ion abundances) of all the  
469 detected features were normalized to the internal standard, telmisartan, before downstream  
470 statistical analyses. Online databases – including KEGG, MassBank, PubChem and  
471 MetaboLights – were used to annotate features based on 10 ppm precursor tolerance, 95%  
472 isotope similarity and 10 ppm theoretical fragmentation pattern matching with fragment  
473 tolerance.

474 The complementary method Relative Mass Defect (RMD) filtering (Ekanayaka et al., 2015) was  
475 used to assist annotation of the unknown features. Briefly, an RMD value of each feature was  
476 calculated in *ppm* as (mass defect/measured monoisotopic mass) x 10<sup>6</sup>. This value reflects the  
477 fractional hydrogen content of a feature and provides an estimate of the relative reduced states of  
478 carbons in the metabolite precursor of that feature. Such information is useful for predicting  
479 chemical categories of the features detected in untargeted metabolomics; in this study helping to  
480 define whether a feature is a terpenoid glycoside (RMD of 350-550) or phenolic (RMD of 200-  
481 350). Features with RMD > 1200 are likely contaminants (e.g. inorganic salts) in the MS system.

482 The criteria used for predicting saponin-like features are: 1) precursor ion mass range of 800 –  
483 1500 Da; 2) 350 – 550 *ppm* pseudomolecular ion RMD; 3) one or multiple neutral losses of the  
484 mass matching a monosaccharide (or monosaccharide – H<sub>2</sub>O) detected at elevated collision  
485 energy; 4) a fragment ion in the range of *m/z* 400 – 500 with RMD >700 *ppm* consistent with an  
486 aglycone, only detected at elevated collision energy. The criteria used for predicting flavonoid-  
487 like features are: 1) precursor ion *m/z* > 271 (corresponding to [M+H]<sup>+</sup> of the flavone, apigenin);  
488 2) precursor ion RMD range of 180 – 350 *ppm*; 3) detection of fragment ions with *m/z* 127, 137,  
489 153 or 165 at elevated collision energy. These are common characteristic fragment ions derived  
490 from the A-ring for commonly observed flavones and flavonols (Ma et al., 1997).

#### 491 **Analysis of switchgrass saponin-like features by acid hydrolysis, derivatization and GC-MS**

492 To analyze saponin-like features, acid hydrolysis was carried out according to the protocol of Kielbasa et  
493 al. (2019). In brief, 300 µL of switchgrass extract, 200 µL of distilled water and 100 µL of 12 M  
494 hydrochloric acid (MilliporeSigma, Burlington, MA) were mixed in a polypropylene  
495 microcentrifuge tube and incubated at 85°C for 2 h. The samples were cooled and evaporated to  
496 dryness under vacuum with the temperature ≤ 40 °C. The resultant pellet was dissolved in 500  
497 µL distilled water and extracted with 500 µL ethyl acetate for phase partition. After this, 300 µL  
498 of the ethyl acetate layer was transferred to a new microcentrifuge tube and evaporated to  
499 dryness under vacuum at room temperature. The dry residue was dissolved in 100 µL *N*-methyl-  
500 *N*-(trimethylsilyl)trifluoroacetamide (MSTFA), derivatized overnight at 60 °C and analyzed  
501 using a 30 m VF5 column (Agilent Technologies, Santa Clara, CA; 0.25 mm ID, 0.25 µm film  
502 thickness) coupled to an Agilent 5975 single quadrupole MS (Agilent Technologies, Santa Clara,  
503 CA) operated using 70 eV electron ionization (EI) or chemical ionization (CI). The MS scanning

504 range was  $m/z$  80 – 800. Splitless sample injection was used, with helium as carrier gas at  
505 constant flow of 1 mL/min and the inlet and transfer line held at 280 °C. The GC temperature  
506 program was as follows: held at 50 °C for 1 min; ramped at 30 °C /min to 200 °C; ramped at 10  
507 °C /min to 320 °C and held for 10 min.

508 Relative quantification of switchgrass sapogenins was performed using commercially available  
509 diosgenin (~95%, Sigma Aldrich) as an external standard. Serially diluted standards (6 - 192  
510  $\mu\text{g/mL}$  dissolved in 80% ethanol) were pre-treated in the same way as the other samples: after  
511 hydrochloric acid hydrolysis, four target peaks were identified that are derived from the  
512 commercial diosgenin. They were termed as “diosgenin 1 – 4” (D1 – D4). D4, eluting at 21.3  
513 minutes, could be detected by EI GC-MS at high standard concentrations (**Fig S3A**). All target  
514 peaks were combined when plotted against the standard’s concentrations to generate six-point  
515 response curve. Duplicate technical replicate analyses were done for each standard sample used  
516 to generate the standard response curve, which was linear ( $r^2 > 0.97$ , **Fig S3B**), and was used to  
517 calculate relative concentrations for sapogenins detected in switchgrass extracts. The relative  
518 quantifications were based on the peak area calculated from total ion chromatograms for  
519 standards and the unknown switchgrass sapogenins with chemical structures similar to diosgenin.  
520 Six individual plants were harvested for each switchgrass genome type and pooled into three  
521 groups of two individual plants. Pooling permitted collection of enough tissue to perform  
522 separate analysis of leaf blade, leaf sheath, stem, rhizome and root to overcome the issue of  
523 limited amount of plant tissue.

## 524 **Statistical analysis**

525 To visualize the metabolomic variation in tissue types, developmental stages and genome types  
526 of switchgrass, we used Hierarchical Clustering Analysis (HCA) and Principal Component  
527 Analysis (PCA). Signals were normalized to internal standard area and tissue mass, and log-  
528 transformed prior to these analyses. To assess the relationship among samples and among  
529 features, hierarchal clustering with Euclidean distance as the similarity measure and Ward.D2 as  
530 the clustering algorithm was used. The relationship results were visualized in the form of  
531 dendrograms on the heatmap. Significance analyses were carried out using the Progenesis QI  
532 software (Waters) to identify the differentially accumulated features (DAFs) between the upland  
533 and lowland ecotypes. The cutoff threshold of the significance analyses was adjusted Student’s t-

534 test  $p$ -value  $\leq 0.05$  and fold-change  $\geq 2$ . Results of the analyses were visualized by volcano plots.  
535 To examine statistical differences in the total saponin concentrations among samples Kruskal-  
536 Wallis test and Post-Hoc Dunn's tests were performed in R (v. 3.5.1).  $P$ -value  $\leq 0.05$  was  
537 considered statistically significant.

538

### 539 **Supplemental Data**

540 The following supplemental materials are available.

541 **Supplemental Figure S1.** The method for sample collection and sample panel involved in this  
542 study.

543 **Supplemental Figure S2.** Significance analysis for the differentially accumulated features  
544 (DAFs) between the upland and lowland switchgrass ecotypes for each given "tissue type x  
545 development stage" combination.

546 **Supplemental Figure S3.** The six-point instrument response curve over a range of 6 – 192  
547 mg/ml by serial dilution of the reference standard, diosgenin.

548 **Supplemental Figure S4.** Potential saponin peaks identified in switchgrass extracts by (EI)  
549 GC-MS.

550 **Supplemental Table S1.** The top 20 most abundant (according to the "Average Abundance")  
551 saponin-like features detected in switchgrass.

552 **Supplemental Table S2.** Relative saponin concentrations (ng/mg dw) in different tissues of  
553 three upland switchgrass cultivars (Dacotah, Summer and Cave-in-Rock) and three lowland  
554 switchgrass cultivars (Alamo, Kanlow and BoMaster).

555 **Supplemental Data S1.** All LC-MS features reported in this study

556 **Supplemental Data S2.** Differentially accumulated features (vegetative tiller)

557 **Supplemental Data S3.** Differentially accumulated features (vegetative root)

558 **Supplemental Data S4.** Differentially accumulated features (transition tiller)

559 **Supplemental Data S5.** Differentially accumulated features (transition rhizome)

- 560 **Supplemental Data S6.** Differentially accumulated features (transition root)  
561 **Supplemental Data S7.** Differentially accumulated features (reproductive tiller)  
562 **Supplemental Data S8.** Differentially accumulated features (reproductive rhizome)  
563 **Supplemental Data S9.** Differentially accumulated features (reproductive root)  
564 **Supplemental Data S10.** Highly differentially accumulated features

565

566

### ACKNOWLEDGMENTS

567 We thank Dr. Gregory Bonito (Michigan State University) for providing the switchgrass  
568 seeds used in this study and helpful advice on the manuscript; Dr. Anne-Sophie Bohrer  
569 (Michigan State University) for helping with the manuscript editing. This material is based upon  
570 work supported by the Great Lakes Bioenergy Research Center, U.S. Department of Energy,  
571 Office of Science, Office of Biological and Environmental Research under Award Number DE-  
572 SC0018409.

573

574



575 **Table 1. Numbers of the total detected features and differentially accumulated features**  
 576 **(DAFs) in extracts of the tissues from each of the eight *developmental stage x tissue type***  
 577 **combinations.**

| <i>Developmental stage x Tissue type</i> | No. of total detected features <sup>a</sup> | No. of DAFs     |                  |                    |
|------------------------------------------|---------------------------------------------|-----------------|------------------|--------------------|
|                                          |                                             | Upland enriched | Lowland enriched | Total <sup>b</sup> |
| <i>Vegetative-stage x tiller</i>         | 1035                                        | 126             | 130              | 256                |
| <i>Vegetative-stage x root</i>           | 879                                         | 149             | 161              | 310                |
| <i>Transition-stage x tiller</i>         | 1037                                        | 155             | 133              | 288                |
| <i>Transition-stage x rhizome</i>        | 1114                                        | 268             | 139              | 407                |
| <i>Transition-stage x root</i>           | 965                                         | 226             | 235              | 461                |
| <i>Reproductive-stage x tiller</i>       | 1612                                        | 100             | 200              | 300                |
| <i>Reproductive-stage x rhizome</i>      | 1378                                        | 324             | 229              | 553                |
| <i>Reproductive-stage x root</i>         | 1327                                        | 408             | 309              | 717                |

578  
 579 <sup>a</sup> The features are overlapping. Thus, the sum of the numbers in this column is larger than 2586,  
 580 which is the total detected features in this study.

581 <sup>b</sup> The DAFs are overlapping. Thus, the sum of the numbers in this column is larger than 1416,  
 582 which is the total detected DAFs in this study.

583 **Table 2. Different forms of the sapogenins identified in switchgrass extracts by GC-MS**

584 **analysis.** Noticeably, the annotations for TMS-derivatized diosgenin (414 [aglycone] + 72 [TMS]  
 585 = 486) and oxydiosgenin (430 [aglycone] + 72 [TMS] = 502) are supported by the cross-  
 586 reference between GC-MS and LC-MS data. The LC-MS analysis detected the positively  
 587 charged aglycone fragment ions,  $m/z$  415 and 431 (**Table S1**), corresponding to the protonated  
 588 diosgenin and oxydiosgenin respectively. TMS, trimethylsilyl group [Si(CH<sub>3</sub>)<sub>3</sub>].

| Peak | Retention index (RI) <sup>a</sup> | Key ion annotations ( $m/z$ ) <sup>b</sup>                                                                                                                                          | Abundant fragment ion $m/z$ <sup>c</sup> | Formula of the neutral molecule                   | Mass of the neutral molecule (Da) | Annotation of the neutral molecule <sup>d</sup> |
|------|-----------------------------------|-------------------------------------------------------------------------------------------------------------------------------------------------------------------------------------|------------------------------------------|---------------------------------------------------|-----------------------------------|-------------------------------------------------|
| D1   | 3116                              | 397 [M+H] <sup>+</sup>                                                                                                                                                              | 139, 282                                 | C <sub>27</sub> H <sub>40</sub> O <sub>2</sub>    | 396                               | Anhydro-diosgenin                               |
| D2   | 3341                              | 397 [M+H-TMS-H <sub>2</sub> O] <sup>+</sup> , 471 [M-CH <sub>3</sub> ] <sup>+</sup> , 485 [M-H] <sup>+</sup> , 487 [M+H] <sup>+</sup>                                               | 139, 187, 282                            | C <sub>30</sub> H <sub>50</sub> O <sub>3</sub> Si | 486                               | Diosgenin (TMS derivatized)                     |
| D3   | 3363                              | 397 [M+H-TMS-H <sub>2</sub> O] <sup>+</sup> , 471 [M-CH <sub>3</sub> ] <sup>+</sup> , 485 [M-H] <sup>+</sup> , 487 [M+H] <sup>+</sup>                                               | 139, 187, 282                            | C <sub>30</sub> H <sub>50</sub> O <sub>3</sub> Si | 486                               | Diosgenin (TMS derivatized)                     |
| S1   | 3114                              | 397 [M+H] <sup>+</sup>                                                                                                                                                              | 139, 282                                 | C <sub>27</sub> H <sub>40</sub> O <sub>2</sub>    | 396                               | Anhydro-diosgenin                               |
| S2   | 3194                              | 397 [M+H-TMS-H <sub>2</sub> O] <sup>+</sup> , 471 [M-CH <sub>3</sub> ] <sup>+</sup> , 485 [M-H] <sup>+</sup> , 487 [M+H] <sup>+</sup>                                               | 139, 282                                 | C <sub>30</sub> H <sub>50</sub> O <sub>3</sub> Si | 486                               | Diosgenin (TMS derivatized)                     |
| S3   | 3339                              | 397 [M+H-TMS-H <sub>2</sub> O] <sup>+</sup> , 471 [M-CH <sub>3</sub> ] <sup>+</sup> , 485 [M-H] <sup>+</sup> , 487 [M+H] <sup>+</sup>                                               | 139, 187, 282                            | C <sub>30</sub> H <sub>50</sub> O <sub>3</sub> Si | 486                               | Diosgenin (TMS derivatized)                     |
| S4   | 3361                              | 397 [M+H-TMS-H <sub>2</sub> O] <sup>+</sup> , 471 [M-CH <sub>3</sub> ] <sup>+</sup> , 485 [M-H] <sup>+</sup> , 487 [M+H] <sup>+</sup>                                               | 139, 187, 282                            | C <sub>30</sub> H <sub>50</sub> O <sub>3</sub> Si | 486                               | Diosgenin (TMS derivatized)                     |
| S5   | 3462                              | 395 [M+H-TMS-2H <sub>2</sub> O] <sup>+</sup> , 413[M+H-TMS-H <sub>2</sub> O] <sup>+</sup> , 487 [M-CH <sub>3</sub> ] <sup>+</sup> , 501 [M-H] <sup>+</sup> , 503 [M+H] <sup>+</sup> | 139, 187, 298                            | C <sub>30</sub> H <sub>50</sub> O <sub>4</sub> Si | 502                               | Oxydiosgenin (TMS derivatized)                  |
| S6   | 3620                              | 395 [M+H-TMS-2H <sub>2</sub> O] <sup>+</sup> , 413[M+H-TMS-H <sub>2</sub> O] <sup>+</sup> , 487 [M-CH <sub>3</sub> ] <sup>+</sup> , 501 [M-H] <sup>+</sup> , 503 [M+H] <sup>+</sup> | 139, 187, 298                            | C <sub>30</sub> H <sub>50</sub> O <sub>4</sub> Si | 502                               | Oxydiosgenin (TMS derivatized)                  |

589  
 590 <sup>a</sup> The RIs were calculated using a homologous series of n-alkane standards with the same GC-  
 591 MS method as the samples (**Fig S4A**).

592 <sup>b</sup> The  $m/z$  information for the key ion annotations was obtained by (CI) GC-MS (**Fig 4B**).

593 <sup>c</sup> The  $m/z$  information for the fragment ions was obtained by (EI) GC-MS (**Fig S4B**).

594 <sup>d</sup> The annotations were made according to the pseudomolecular and fragment ion information  
 595 (the names were given based upon the predicted formulas). The structures of the molecules are  
 596 unknown.

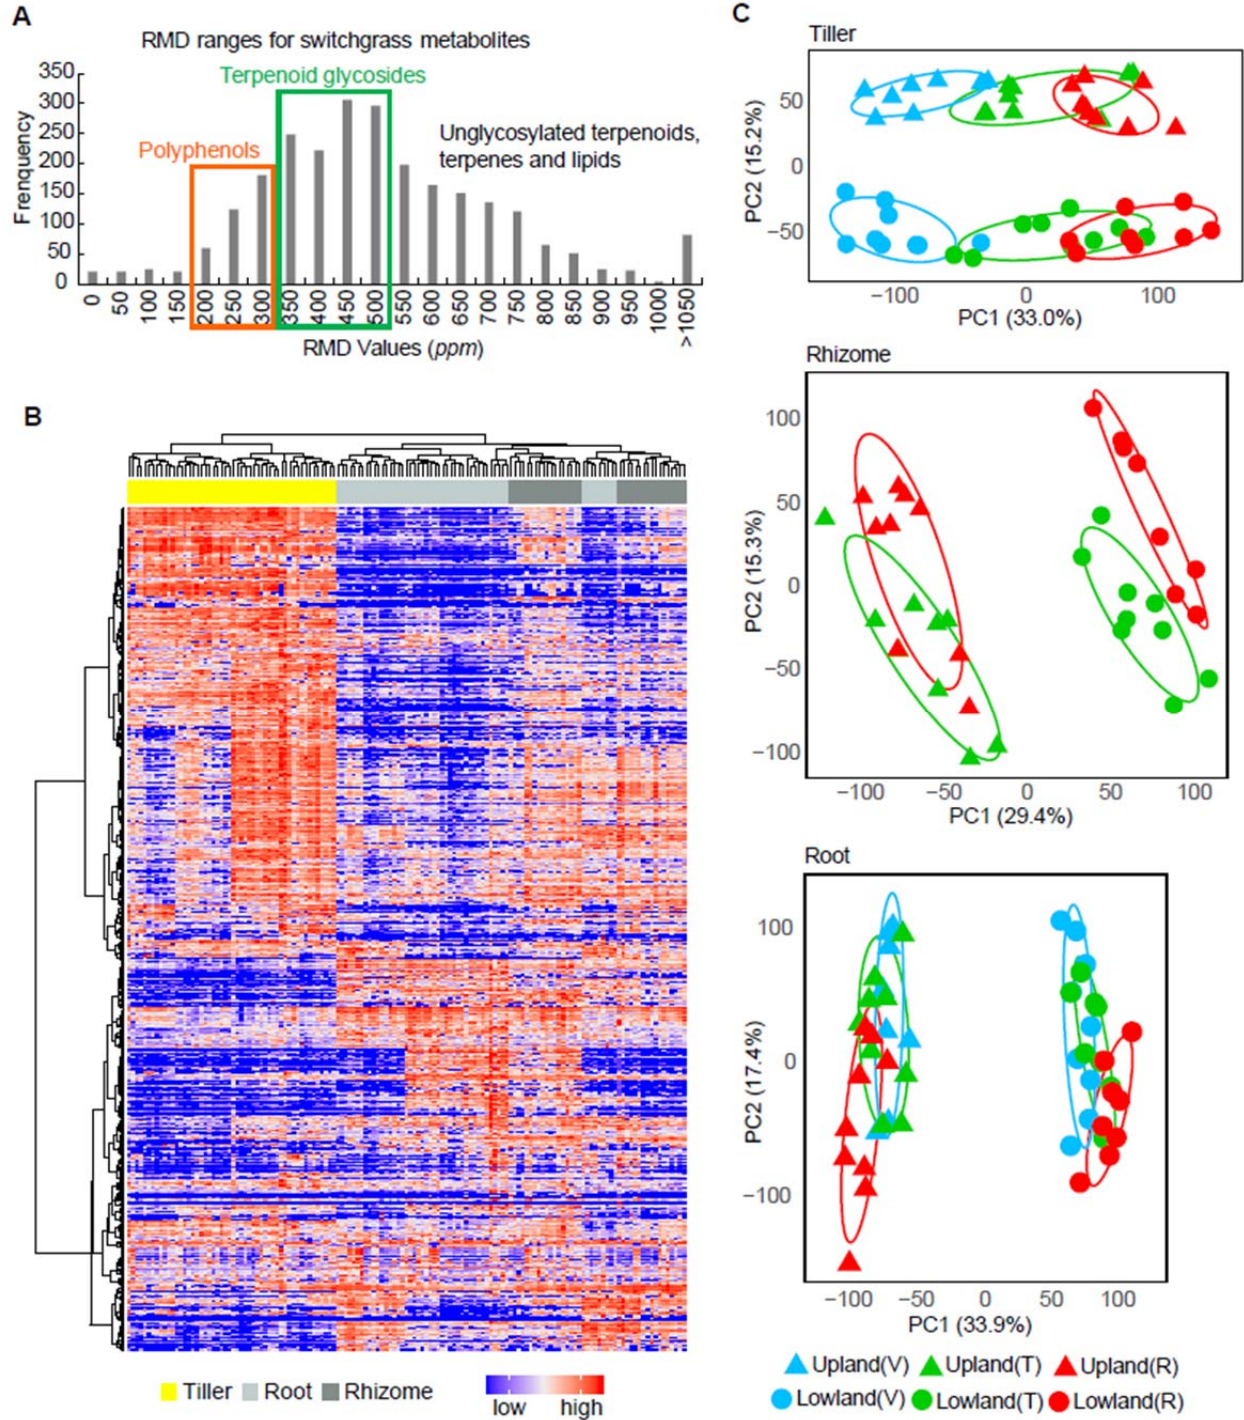

597

598

599

600

601

602 **Figure 1. Untargeted metabolome profiling for switchgrass.** (A) Histogram of RMD values  
603 for the total 2586 features detected in this study by LC-MS in positive ion mode. The green and  
604 orange rectangles highlight regions corresponding to the ranges of the RMD values anticipated  
605 for terpenoid glycosides and polyphenols, respectively. (B) The metabolome of the six  
606 switchgrass cultivars, three tissue types and three developmental stages shown by a heatmap with  
607 HCA. The row and column clusters symbolize the 2586 features and 48 sample groups  
608 (containing 139 individual samples), respectively. The values representing the metabolite  
609 abundances that were used to make the heatmap were scaled to a range from 0 (the lowest  
610 abundance) to 1 (the highest abundance). (C) PCA-score plots for the switchgrass tiller, rhizome  
611 and root metabolite profiles (n=8 for ‘Upland Vegetative’ and ‘Lowland Reproductive’; n=9 for  
612 all the other groups). The percentage of explained variation is shown on the x- and y-axes. V,  
613 vegetative phase; T, transition phase; R, reproductive phase.  
614  
615  
616

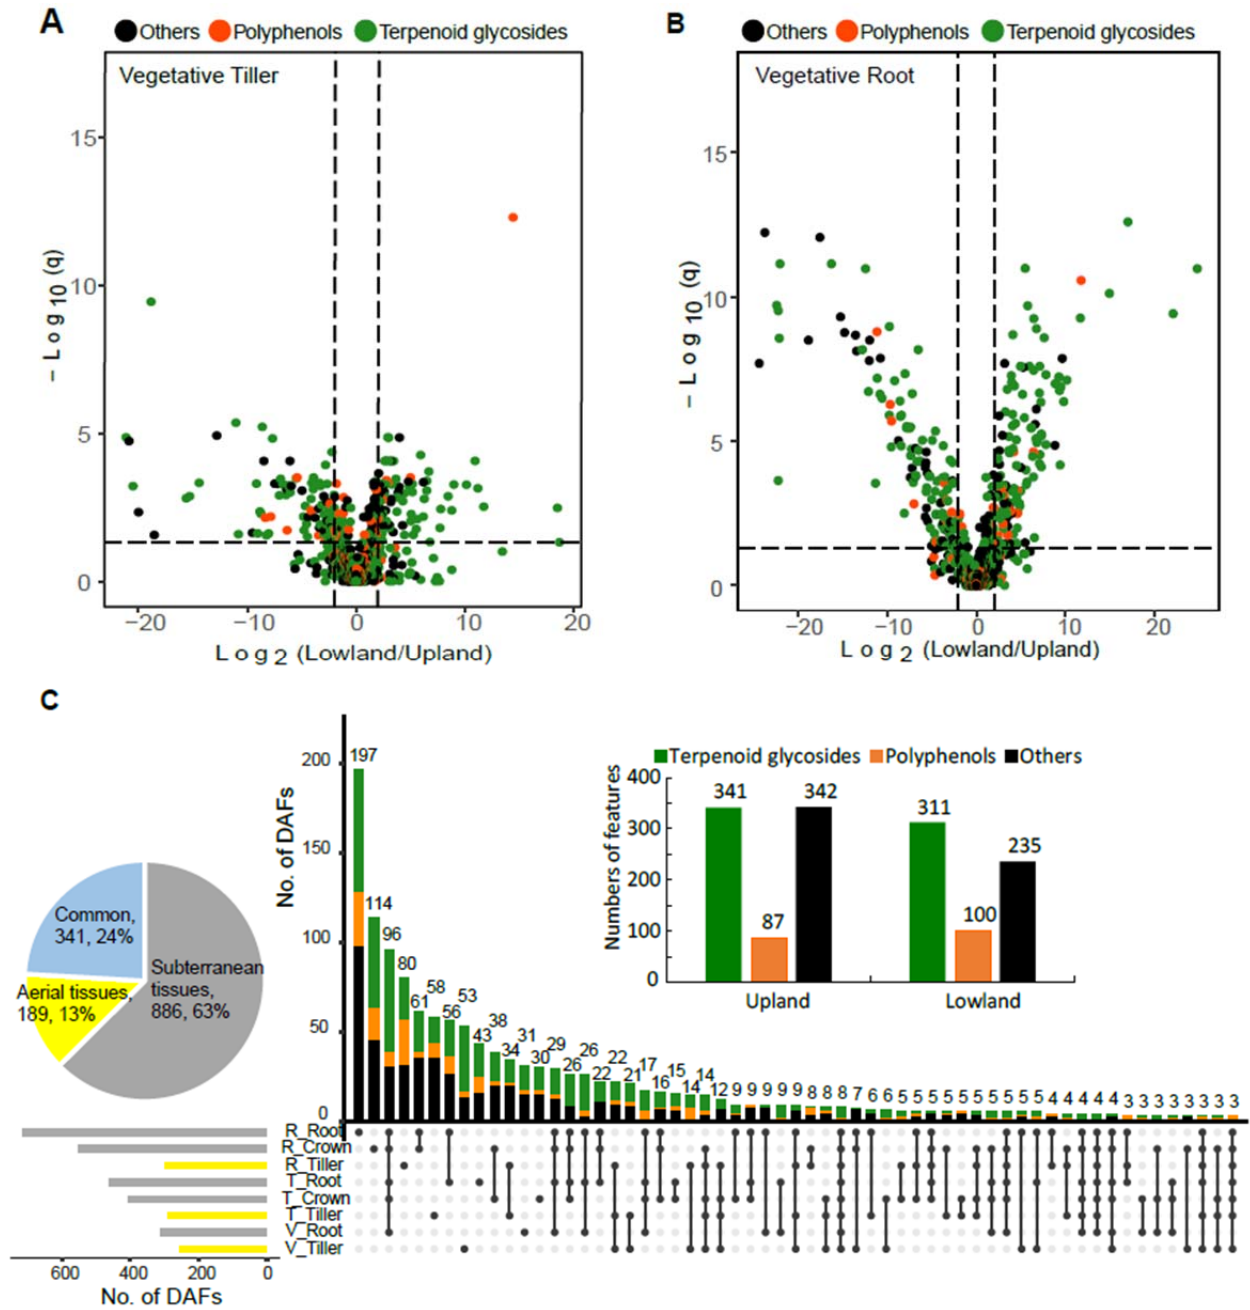

617

618

619

620

621

622

623

624 **Figure 2. Differentially accumulated features (DAFs) were identified between the upland**  
625 **and lowland ecotypes.** Significance analysis (cutoff threshold: adjusted  $P$ -value  $\leq 0.05$ ; fold  
626 changes  $\geq 2$ ) was performed to screen for the DAFs between the upland and lowland switchgrass  
627 ecotypes ( $n = 8$  or  $9$ ) in various *developmental stage x tissue type* samples. Results of the  
628 analyses for (A) *vegetative-stage tillers* and (B) *vegetative-stage roots* are shown here using  
629 volcano plots. Putative terpenoid glycosides, polyphenols and metabolites from the other  
630 categories were classified using RMD filtering and the results color coded. (C) In total, 1416  
631 unique (non-overlapping) ecotype DAFs were identified for the eight *developmental stage x*  
632 *tissue type* combinations. The inserted barplot shows that upland and lowland ecotypes  
633 accumulated similar numbers of the predominant DAFs likely terpenoid glycosides (green) and  
634 polyphenols (orange). The inserted pie chart indicates percentages of the DAFs contributed by  
635 aerial (tiller) vs. subterranean (root/rhizome) tissues.

636

637

638

639

640

641

642

643

644

645

646

647

648

649

650

651

652

653

654



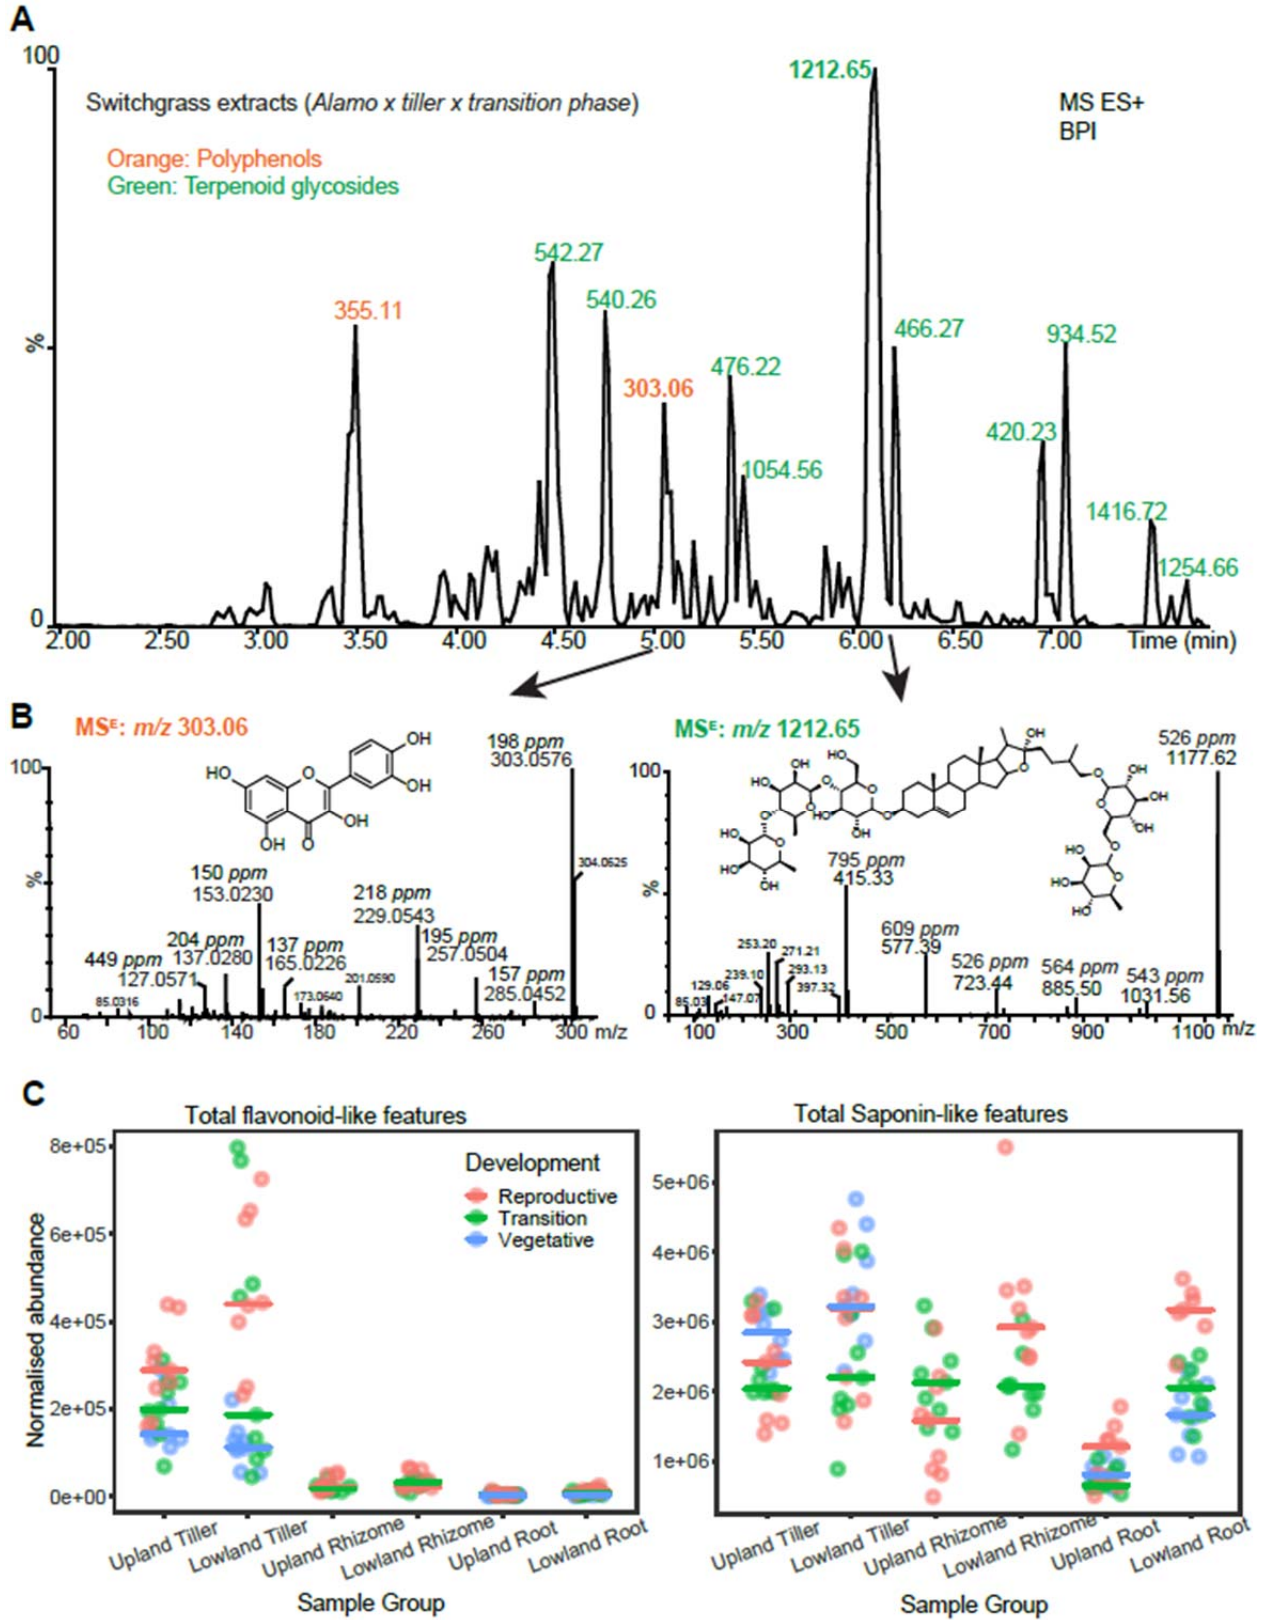

655

656 **Figure 3. Saponins, terpenoid glycosides and polyphenols (e.g. flavonoids) dominate**  
657 **switchgrass extracts** (A) A portion of LC-MS base peak intensity (BPI) chromatogram rich in  
658 saponins, terpenoid glycosides and phenolics. This BPI chromatogram was generated from the  
659 extracts of the *transition-stage tillers* of lowland switchgrass, Alamo. The numbers on tops of the  
660 peaks are  $m/z$  values of the most abundant features in the peaks (Green text, terpenoid  
661 glycosides; Orange text, polyphenols). (B) High energy MS<sup>E</sup> fragmentation pattern of the  $m/z$   
662 1212 saponin was shown in the right panel. The fragment ions (spectra) that are thought to be  
663 derived from the fully glycosylated saponin are labeled with their RMD values (upper numbers  
664 in *ppm*). A putative structure of this saponin is shown in the inset. The MS<sup>E</sup> fragmentation  
665 pattern of the  $m/z$  303 quercetin was shown in the left panel. The  $m/z$  127, 153 and 165 were  
666 derived from the A ring. The  $m/z$  137 was derived from the B ring. The  $m/z$  229, 257 and 285  
667 correspond to  $[M+H-H_2O-2CO]^+$ ,  $[M+H-H_2O-CO]^+$  and  $[M+H-H_2O]^+$  respectively. (C) Relative  
668 quantification for the sum of saponin-like (right) and flavonoid-like (left) features in each  
669 *genotype x developmental stage x tissue type* class (n = 8 or 9). Colored horizontal bars represent  
670 median values. Normalized abundances (y-axis) were calculated as (*ion intensity of the feature /*  
671 *ion intensity of the internal standard*) x 1000.

672

673

674

675

676

677

678

679

680

681

682

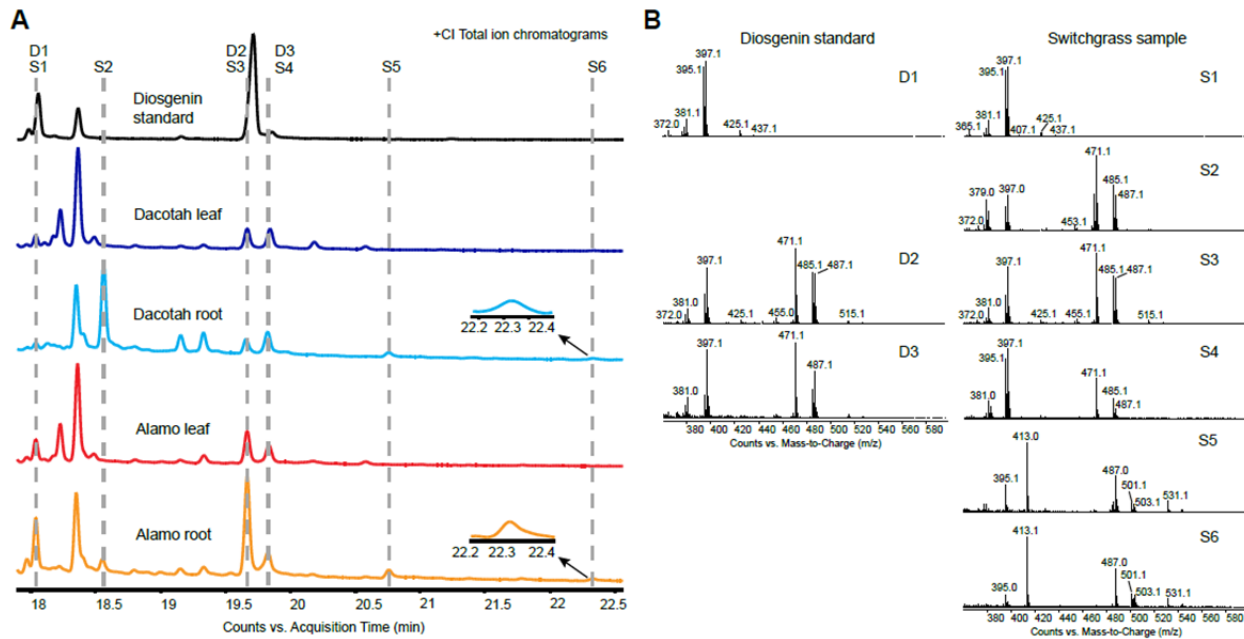

683

684

685 **Figure 4. Potential sapogenin peaks were identified in switchgrass extracts by GC-MS. (A)**

686 +(CI) GC-MS total ion chromatograms (TICs) of diosgenin standard (black), Dacotah leaf (dark

687 blue), Dacotah root (blue), Alamo leaf (red) and Alamo root (orange). The identified potential

688 sapogenin peaks in the switchgrass and standard samples are indicated and aligned by the dashed

689 lines. Note that the S1, S3 and S4 peaks in all switchgrass samples have slightly different RTs

690 from the D1, D2 and D3 peaks correspondingly in the diosgenin standard sample (black).

691 Zoomed-in views for the peak S6 in Dacotah root and Alamo root are indicated by the arrows.

692 (B) The (CI) GC-MS spectral patterns of the sapogenin peaks detected in the standard and

693 switchgrass samples.

694

695

696

697

698

699

700

701

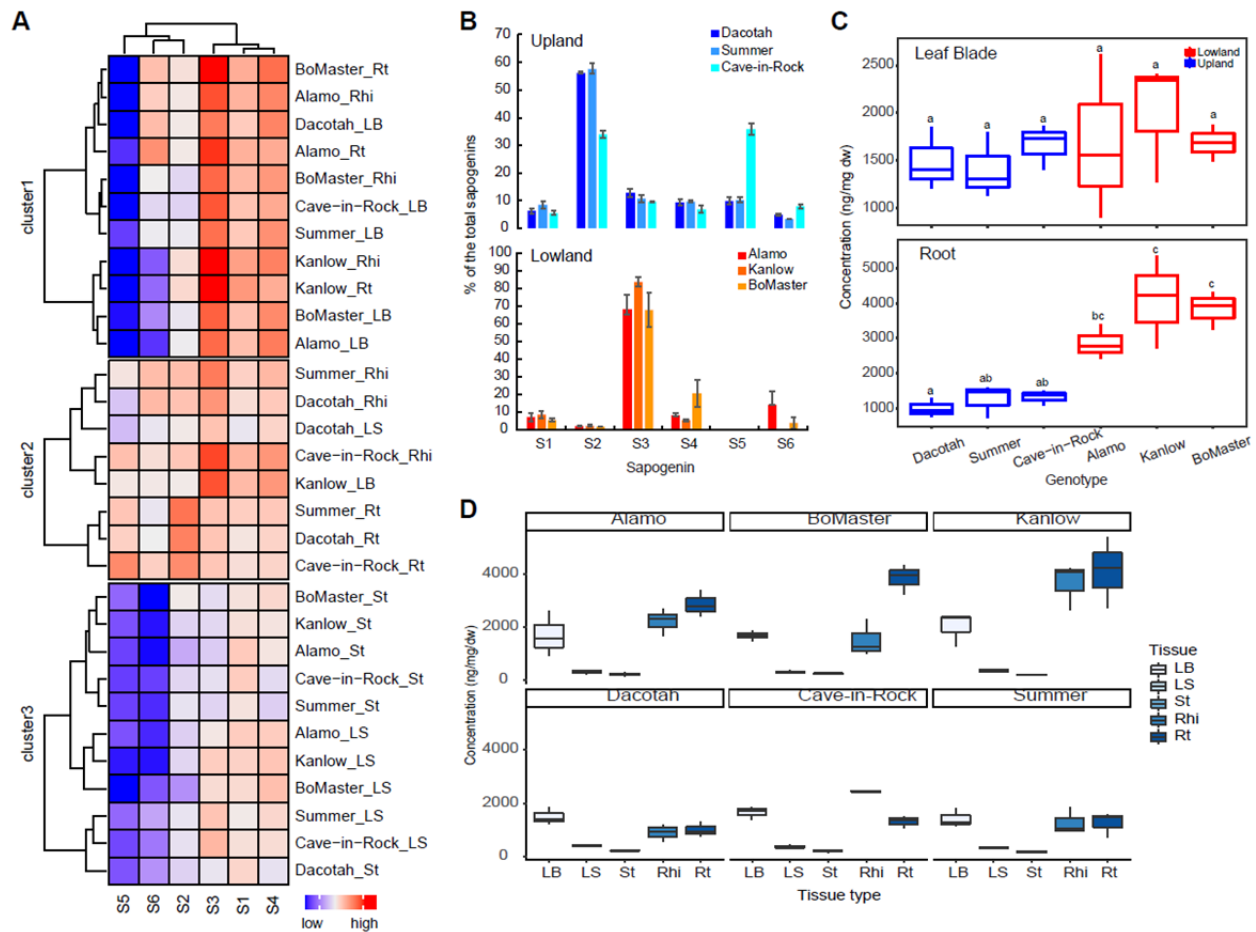

702

703 **Figure 5. Variations in sapogenin concentrations among the switchgrass genotypes, tissue**  
 704 **types and genotype  $\times$  tissue type.** (A) A heatmap with HCA generated using data from **Table S2**

705 showing a profile of concentrations of the individual sapogenins in the different genotype  $\times$  tissue  
 706 type combinations. The concentration values were log<sub>10</sub> scaled to a range between 0 (lowest)

707 and 4 (highest). (B) The ratio of the individual sapogenins in roots of the three upland and three  
 708 lowland switchgrass cultivars. Heights of the bars reflect the means of the three replicates for

709 individual cultivars; error bars show the standard error of the mean. (C) Comparison of the total  
 710 sapogenin among the six switchgrass cultivars in leaf blade (Kruskal-Wallis test:  $P = 0.766$ ) and

711 root (Kruskal-Wallis test,  $P = 0.016$ ). Different lower-case letters on top of the boxes designate  
 712 statistically different means (Post-Hoc test: Dunn's test). (D) Comparison of the total sapogenin

713 concentrations among the five tissue types for each switchgrass cultivar. LB, leaf blade; LS, leaf  
 714 sheath, St, stem; Rhi, rhizome; Rt, root.

715

716



## Parsed Citations

Ahuja, I., Kissen, R., & Bones, A. M. (2012). Phytoalexins in defense against pathogens. *Trends in Plant Science*, 17(2), 73–90.

Pubmed: [Author and Title](#)

Google Scholar: [Author Only Title Only Author and Title](#)

Aspinwall, M. J., Lowry, D. B., Taylor, S. H., Juenger, T. E., Hawkes, C. V., Johnson, M.-V. V., Kiniry, J. R., & Fay, P. A. (2013). Genotypic variation in traits linked to climate and aboveground productivity in a widespread C<sub>4</sub> grass: Evidence for a functional trait syndrome. *The New Phytologist*, 199(4), 966–980.

Pubmed: [Author and Title](#)

Google Scholar: [Author Only Title Only Author and Title](#)

Berendsen, R. L., Pieterse, C. M. J., & Bakker, P. A. H. M. (2012). The rhizosphere microbiome and plant health. *Trends in Plant Science*, 17(8), 478–486.

Pubmed: [Author and Title](#)

Google Scholar: [Author Only Title Only Author and Title](#)

Bialy, Z., Jurzysta, M., Oleszek, W., Piacente, S., & Pizza, C. (1999). Saponins in alfalfa (*Medicago sativa* L.) root and their structural elucidation. *Journal of Agricultural and Food Chemistry*, 47(8), 3185–3192.

Pubmed: [Author and Title](#)

Google Scholar: [Author Only Title Only Author and Title](#)

**Casler, M. D., Vogel, K. P., & Harrison, M. (2015). Switchgrass Germplasm Resources.**

Christ, B., Pluskal, T., Aubry, S., & Weng, J.-K. (2018). Contribution of Untargeted Metabolomics for Future Assessment of Biotech Crops. *Trends in Plant Science*, 23(12), 1047–1056.

Pubmed: [Author and Title](#)

Google Scholar: [Author Only Title Only Author and Title](#)

Compant, S., Samad, A., Faist, H., & Sessitsch, A. (2019). A review on the plant microbiome: Ecology, functions, and emerging trends in microbial application. *Journal of Advanced Research*, 19, 29–37.

Pubmed: [Author and Title](#)

Google Scholar: [Author Only Title Only Author and Title](#)

Ekanayaka, E. A. P., Celiz, M. D., & Jones, A. D. (2015). Relative Mass Defect Filtering of Mass Spectra: A Path to Discovery of Plant Specialized Metabolites. *Plant Physiology*, 167(4), 1221.

Pubmed: [Author and Title](#)

Google Scholar: [Author Only Title Only Author and Title](#)

Grabowski, P. P., Evans, J., Daum, C., Deshpande, S., Barry, K. W., Kennedy, M., Ramstein, G., Kaeppler, S. M., Buell, C. R., Jiang, Y., & Casler, M. D. (2017). Genome-wide associations with flowering time in switchgrass using exome-capture sequencing data. *New Phytologist*, 213(1), 154–169.

Pubmed: [Author and Title](#)

Google Scholar: [Author Only Title Only Author and Title](#)

Grady, K. L., Sorensen, J. W., Stopnisek, N., Guittar, J., & Shade, A. (2019). Assembly and seasonality of core phyllosphere microbiota on perennial biofuel crops. *Nature Communications*, 10(1), 1–10.

Pubmed: [Author and Title](#)

Google Scholar: [Author Only Title Only Author and Title](#)

Hartmann, T. (2007). From waste products to ecochemicals: Fifty years research of plant secondary metabolism. *Phytochemistry*, 68(22), 2831–2846.

Pubmed: [Author and Title](#)

Google Scholar: [Author Only Title Only Author and Title](#)

Hoagland, D. R. (Dennis R., & Arnon, D. I. (Daniel I. (1950). The water-culture method for growing plants without soil. Berkeley, Calif.: College of Agriculture, University of California.

Pubmed: [Author and Title](#)

Google Scholar: [Author Only Title Only Author and Title](#)

Holland, P. T., Miles, C. O., Mortimer, P. H., Wilkins, A. L., Hawkes, A. D., & Smith, B. L. (1991). Isolation of the steroidal saponin epismilagenin from the bile of sheep affected by *Panicum dichotomiflorum* toxicosis. *Journal of Agricultural and Food Chemistry*, 39(11), 1963–1965.

Pubmed: [Author and Title](#)

Google Scholar: [Author Only Title Only Author and Title](#)

Huang, A. C., Jiang, T., Liu, Y.-X., Bai, Y.-C., Reed, J., Qu, B., Goossens, A., Nützmann, H.-W., Bai, Y., & Osbourn, A. (2019). A specialized metabolic network selectively modulates *Arabidopsis* root microbiota. *Science (New York, N.Y.)*, 364(6440), eaau6389.

Pubmed: [Author and Title](#)

Google Scholar: [Author Only Title Only Author and Title](#)

Huhman, D. V., Berhow, M. A., & Sumner, L. W. (2005). Quantification of Saponins in Aerial and Subterranean Tissues of *Medicago truncatula*. *Journal of Agricultural and Food Chemistry*, 53(6), 1914–1920.

Pubmed: [Author and Title](#)



Google Scholar: [Author Only](#) [Title Only](#) [Author and Title](#)

Jiao, Y., Wang, Y., Xue, D., Wang, J., Yan, M., Liu, G., Dong, G., Zeng, D., Lu, Z., Zhu, X., Qian, Q., & Li, J. (2010). Regulation of OsSPL14 by OsmiR156 defines ideal plant architecture in rice. *Nature Genetics*, 42(6), 541–544.

Pubmed: [Author and Title](#)

Google Scholar: [Author Only](#) [Title Only](#) [Author and Title](#)

Kielbasa, A., Krakowska, A., Rafińska, K., & Buszewski, B. (2019). Isolation and determination of saponin hydrolysis products from *Medicago sativa* using supercritical fluid extraction, solid-phase extraction and liquid chromatography with evaporative light scattering detection. *Journal of Separation Science*, 42(2), 465–474.

Pubmed: [Author and Title](#)

Google Scholar: [Author Only](#) [Title Only](#) [Author and Title](#)

Kiniry, J. R., Anderson, L. C., Johnson, M.-V. V., Behrman, K. D., Brakie, M., Burner, D., Cordsiemon, R. L., Fay, P. A., Fritschi, F. B., Houx, J. H., Hawkes, C., Juenger, T., Kaiser, J., Keitt, T. H., Lloyd-Reilley, J., Maher, S., Raper, R., Scott, A., Shadow, A., ... Zibilske, L. (2013). Perennial Biomass Grasses and the Mason–Dixon Line: Comparative Productivity across Latitudes in the Southern Great Plains. *BioEnergy Research*, 6(1), 276–291.

Pubmed: [Author and Title](#)

Google Scholar: [Author Only](#) [Title Only](#) [Author and Title](#)

Last, R. L., Jones, A. D., & Shachar-Hill, Y. (2007). Towards the plant metabolome and beyond. *Nature Reviews Molecular Cell Biology*, 8(2), 167–174.

Pubmed: [Author and Title](#)

Google Scholar: [Author Only](#) [Title Only](#) [Author and Title](#)

Lee, Stephen T., Mitchell, R. B., Wang, Z., Heiss, C., Gardner, D. R., & Azadi, P. (2009). Isolation, Characterization, and Quantification of Steroidal Saponins in Switchgrass (*Panicum virgatum* L.). *Journal of Agricultural and Food Chemistry*, 57(6), 2599–2604.

Pubmed: [Author and Title](#)

Google Scholar: [Author Only](#) [Title Only](#) [Author and Title](#)

Lowry, D. B., Lovell, J. T., Zhang, L., Bonnette, J., Fay, P. A., Mitchell, R. B., Lloyd-Reilley, J., Boe, A. R., Wu, Y., Rouquette, F. M., Wynia, R. L., Weng, X., Behrman, K. D., Healey, A., Barry, K., Lipzen, A., Bauer, D., Sharma, A., Jenkins, J., ... Juenger, T. E. (2019). QTL × environment interactions underlie adaptive divergence in switchgrass across a large latitudinal gradient. *Proceedings of the National Academy of Sciences*, 116(26), 12933.

Pubmed: [Author and Title](#)

Google Scholar: [Author Only](#) [Title Only](#) [Author and Title](#)

Ma, Y. L., Li, Q. M., Heuvel, H. V. den, & Claeys, M. (1997). Characterization of flavone and flavonol aglycones by collision-induced dissociation tandem mass spectrometry. *Rapid Communications in Mass Spectrometry*, 11(12), 1357–1364.

Pubmed: [Author and Title](#)

Google Scholar: [Author Only](#) [Title Only](#) [Author and Title](#)

Massalha, H., Korenblum, E., Tholl, D., & Aharoni, A. (2017). Small molecules below-ground: The role of specialized metabolites in the rhizosphere. *The Plant Journal*, 90(4), 788–807.

Pubmed: [Author and Title](#)

Google Scholar: [Author Only](#) [Title Only](#) [Author and Title](#)

Milano, E. R., Lowry, D. B., & Juenger, T. E. (2016). The Genetic Basis of Upland/Lowland Ecotype Divergence in Switchgrass (*Panicum virgatum*). *G3*.

Pubmed: [Author and Title](#)

Google Scholar: [Author Only](#) [Title Only](#) [Author and Title](#)

Moses, T., Papadopoulou, K. K., & Osbourn, A. (2014). Metabolic and functional diversity of saponins, biosynthetic intermediates and semi-synthetic derivatives. *Critical Reviews in Biochemistry and Molecular Biology*, 49(6), 439–462.

Pubmed: [Author and Title](#)

Google Scholar: [Author Only](#) [Title Only](#) [Author and Title](#)

Muchlinski, A., Chen, X., Lovell, J. T., Köllner, T. G., Pelot, K. A., Zerbe, P., Ruggiero, M., Callaway, L., 3rd, Laliberte, S., Chen, F., & Tholl, D. (2019). Biosynthesis and Emission of Stress-Induced Volatile Terpenes in Roots and Leaves of Switchgrass (*Panicum virgatum* L.). *Frontiers in Plant Science*, 10, 1144–1144.

Pubmed: [Author and Title](#)

Google Scholar: [Author Only](#) [Title Only](#) [Author and Title](#)

Munday, S. C., Wilkins, A. L., Miles, C. O., & Holland, P. T. (1993). Isolation and structure elucidation of dichotomin, a furostanol saponin implicated in hepatogenous photosensitization of sheep grazing *Panicum dichotomiflorum*. *Journal of Agricultural and Food Chemistry*, 41(2), 267–271.

Pubmed: [Author and Title](#)

Google Scholar: [Author Only](#) [Title Only](#) [Author and Title](#)

Murphy, K. M., & Zerbe, P. (2020). Specialized diterpenoid metabolism in monocot crops: Biosynthesis and chemical diversity. *Phytochemistry*, 172, 112289.

Pubmed: [Author and Title](#)

Google Scholar: [Author Only](#) [Title Only](#) [Author and Title](#)

**Nielsen, E. L. (1947). Polyploidy and Winter Survival in *Panicum virgatum* L.1.**

**Oleszek, W., Jurzysta, M., Price, K. R., & Fenwick, G. R. (1990). High-performance liquid chromatography of alfalfa root saponins. *Journal of Chromatography A*, 519(1), 109–116.**

Pubmed: [Author and Title](#)

Google Scholar: [Author Only](#) [Title Only](#) [Author and Title](#)

**Osborn, A. E., Clarke, B. R., Lunness, P., Scott, P. R., & Daniels, M. J. (1994). An oat species lacking avenacin is susceptible to infection by *Gaeumannomyces graminis* var. *Tritici*. *Physiological and Molecular Plant Pathology*, 45(6), 457–467.**

Pubmed: [Author and Title](#)

Google Scholar: [Author Only](#) [Title Only](#) [Author and Title](#)

**Osborn, Anne E. (2003). Saponins in cereals. *Phytochemistry*, 62(1), 1–4.**

Pubmed: [Author and Title](#)

Google Scholar: [Author Only](#) [Title Only](#) [Author and Title](#)

**Palmer, N. A., Saathoff, A. J., Scully, E. D., Tobias, C. M., Twigg, P., Madhavan, S., Schmer, M., Cahoon, R., Sattler, S. E., Edmé, S. J., Mitchell, R. B., & Sarath, G. (2017). Seasonal below-ground metabolism in switchgrass. *The Plant Journal*, 92(6), 1059–1075.**

Pubmed: [Author and Title](#)

Google Scholar: [Author Only](#) [Title Only](#) [Author and Title](#)

**Patamalai, B., Hejtmancik, E., Bridges, C. H., Hill, D. W., & Camp, B. J. (1990). The isolation and identification of steroidal saponins in Kleingrass. *Veterinary and Human Toxicology*, 32(4), 314–318.**

Pubmed: [Author and Title](#)

Google Scholar: [Author Only](#) [Title Only](#) [Author and Title](#)

**Pelot, K. A., Chen, R., Hagelthorn, D. M., Young, C. A., Addison, J. B., Muchlinski, A., Tholl, D., & Zerbe, P. (2018). Functional Diversity of Diterpene Synthases in the Biofuel Crop Switchgrass. *Plant Physiology*, 178(1), 54–71.**

Pubmed: [Author and Title](#)

Google Scholar: [Author Only](#) [Title Only](#) [Author and Title](#)

**Pichersky, E., & Lewinsohn, E. (2011). Convergent Evolution in Plant Specialized Metabolism. *Annual Review of Plant Biology*, 62(1), 549–566.**

Pubmed: [Author and Title](#)

Google Scholar: [Author Only](#) [Title Only](#) [Author and Title](#)

**Poole, P., Ramachandran, V., & Terpolilli, J. (2018). Rhizobia: From saprophytes to endosymbionts. *Nature Reviews Microbiology*, 16(5), 291–303.**

Pubmed: [Author and Title](#)

Google Scholar: [Author Only](#) [Title Only](#) [Author and Title](#)

**Puoli, J. R., Reid, R. L., & Belesky, D. P. (1992). Photosensitization in Lambs Grazing Switchgrass. *Agronomy Journal*, 84(6), 1077–1080.**

Pubmed: [Author and Title](#)

Google Scholar: [Author Only](#) [Title Only](#) [Author and Title](#)

**Sage, R. F., de Melo Peixoto, M., Friesen, P., & Deen, B. (2015). C 4 bioenergy crops for cool climates, with special emphasis on perennial C 4 grasses. *Journal of Experimental Botany*, 66(14), 4195–4212.**

Pubmed: [Author and Title](#)

Google Scholar: [Author Only](#) [Title Only](#) [Author and Title](#)

**Sanderson, M. A., Adler, P. R., Boateng, A. A., Casler, M. D., & Sarath, G. (2006). Switchgrass as a biofuels feedstock in the USA. *Canadian Journal of Plant Science*, 86(Special Issue), 1315–1325.**

Pubmed: [Author and Title](#)

Google Scholar: [Author Only](#) [Title Only](#) [Author and Title](#)

**Sands, R. D., Malcolm, S. A., Suttles, S. A., & Marshall, E. (2017). Dedicated Energy Crops and Competition for Agricultural Land (No. 1477-2016–121188). *AgEcon Search*.**

Pubmed: [Author and Title](#)

Google Scholar: [Author Only](#) [Title Only](#) [Author and Title](#)

**Schrimpe-Rutledge, A. C., Codreanu, S. G., Sherrod, S. D., & McLean, J. A. (2016). Untargeted Metabolomics Strategies-Challenges and Emerging Directions. *Journal of the American Society for Mass Spectrometry*, 27(12), 1897–1905.**

Pubmed: [Author and Title](#)

Google Scholar: [Author Only](#) [Title Only](#) [Author and Title](#)

**Singer, E., Bonnette, J., Kenaley, S. C., Woyke, T., & Juenger, T. E. (2019). Plant compartment and genetic variation drive microbiome composition in switchgrass roots. *Environmental Microbiology Reports*, 11(2), 185–195.**

Pubmed: [Author and Title](#)

Google Scholar: [Author Only](#) [Title Only](#) [Author and Title](#)

**Thimmappa, R., Geisler, K., Louveau, T., O'Maille, P., & Osborn, A. (2014). Triterpene Biosynthesis in Plants. *Annual Review of Plant Biology*, 65(1), 225–257.**

Pubmed: [Author and Title](#)

Google Scholar: [Author Only](#) [Title Only](#) [Author and Title](#)

**Tissier, A., Ziegler, J., & Vogt, T. (2014). Specialized Plant Metabolites: Diversity and Biosynthesis. In G.-J. Krauss & D. H. Nies (Eds.), Ecological Biochemistry (pp. 14–37).**

Pubmed: [Author and Title](#)

Google Scholar: [Author Only Title Only Author and Title](#)

**Turner, M. F., Heuberger, A. L., Kirkwood, J. S., Collins, C. C., Wolfrum, E. J., Broeckling, C. D., Prenni, J. E., & Jahn, C. E. (2016). Non-targeted Metabolomics in Diverse Sorghum Breeding Lines Indicates Primary and Secondary Metabolite Profiles Are Associated with Plant Biomass Accumulation and Photosynthesis. *Frontiers in Plant Science*, 7.**

Pubmed: [Author and Title](#)

Google Scholar: [Author Only Title Only Author and Title](#)

**Turner, T. R., Ramakrishnan, K., Walshaw, J., Heavens, D., Alston, M., Swarbreck, D., Osbourn, A., Grant, A., & Poole, P. S. (2013). Comparative metatranscriptomics reveals kingdom level changes in the rhizosphere microbiome of plants. *The ISME Journal*, 7(12), 2248–2258.**

Pubmed: [Author and Title](#)

Google Scholar: [Author Only Title Only Author and Title](#)

**Tzin, V., Snyder, J. H., Yang, D. S., Huhman, D. V., Watson, B. S., Allen, S. N., Tang, Y., Miettinen, K., Arendt, P., Pollier, J., Goossens, A., & Sumner, L. W. (2019). Integrated metabolomics identifies CYP72A67 and CYP72A68 oxidases in the biosynthesis of *Medicago truncatula* oleanate saponin. *Metabolomics*, 15(6), 85.**

Pubmed: [Author and Title](#)

Google Scholar: [Author Only Title Only Author and Title](#)

**Uppalapati, S. R., Serba, D. D., Ishiga, Y., Szabo, L. J., Mittal, S., Bhandari, H. S., Bouton, J. H., Mysore, K. S., & Saha, M. C. (2013). Characterization of the Rust Fungus, *Puccinia emaculata*, and Evaluation of Genetic Variability for Rust Resistance in Switchgrass Populations. *BioEnergy Research*, 6(2), 458–468.**

Pubmed: [Author and Title](#)

Google Scholar: [Author Only Title Only Author and Title](#)

**Uppugundla, N., Engelberth, A., Vandhana Ravindranath, S., Clausen, E. C., Lay, J. O., Gidden, J., & Carrier, D. J. (2009). Switchgrass Water Extracts: Extraction, Separation and Biological Activity of Rutin and Quercitrin. *Journal of Agricultural and Food Chemistry*, 57(17), 7763–7770.**

Pubmed: [Author and Title](#)

Google Scholar: [Author Only Title Only Author and Title](#)

**VanWallendael, A., Bonnette, J., Juenger, T. E., Fritschi, F. B., Fay, P. A., Mitchell, R. B., Lloyd-Reilley, J., Rouquette, F. M., Bergstrom, G. C., & Lowry, D. B. (2020). Geographic variation in the genetic basis of resistance to leaf rust between locally adapted ecotypes of the biofuel crop switchgrass (*Panicum virgatum*). *New Phytologist*.**

Pubmed: [Author and Title](#)

Google Scholar: [Author Only Title Only Author and Title](#)

**Wei, Z., Gu, Y., Friman, V.-P., Kowalchuk, G. A., Xu, Y., Shen, Q., & Jousset, A. (2019). Initial soil microbiome composition and functioning predetermine future plant health. *Science Advances*, 5(9), eaaw0759–eaaw0759.**

Pubmed: [Author and Title](#)

Google Scholar: [Author Only Title Only Author and Title](#)

**Zhou, S., Kremliing, K. A., Bandillo, N., Richter, A., Zhang, Y. K., Ahern, K. R., Artyukhin, A. B., Hui, J. X., Younkin, G. C., Schroeder, F. C., Buckler, E. S., & Jander, G. (2019). Metabolome-Scale Genome-Wide Association Studies Reveal Chemical Diversity and Genetic Control of Maize Specialized Metabolites. *The Plant Cell*, 31(5), 937.**

Pubmed: [Author and Title](#)

Google Scholar: [Author Only Title Only Author and Title](#)
